# Supplementary material for: Tunable synthesis of alcohols and aldehydes by reductive hydroformylation of alkenes over heterogeneous Co catalysts
Source: Royal Society of Chemistry journal article supplement (doi:10.1039/d4cy01527d), 2025-01-01

## Supplementary Information

### Table of Contents

|                                                                    |           |
|--------------------------------------------------------------------|-----------|
| <b>1. General Information and Experimental Section .....</b>       | <b>1</b>  |
| <b>2. Optimization of the reaction conditions .....</b>            | <b>3</b>  |
| <b>3. Characterization Result of Catalyst .....</b>                | <b>7</b>  |
| <b>4. Representative GC Data and NMR data of the Products.....</b> | <b>13</b> |

# 1. General Information and Experimental Section

**General Information:** Unless otherwise noted, all commercially available reagents were used without further purification. The contents of Co in the catalysts were measured by inductively coupled plasma-atomic emission spectrometry (ICP-AES), using Iris advantage Thermo Jarrel Ash device. Fourier transform infrared (FT-IR) spectrum were recorded with a Bruker VERTEX 70FTIR spectrometer. The liquid nuclear magnetic resonance spectra (NMR) were recorded on a Bruker Avance™ III 400 MHz in deuterated chloroform unless otherwise noted. Powder X-ray diffraction (PXRD) measurements were conducted by a STADIP automated transmission diffractometer (STOE) equipped with an incident beam curved germanium monochromator selecting CuK $\alpha$ 1 radiation and a 6° position sensitive detector (PSD) (step size: 0.014°, step time: 25.05 s). The XRD patterns were scanned in the 2 $\theta$  range of 10–80°. Nitrogen adsorption–desorption isotherms were measured at 77 K using an American Quantachrome iQ2 automated gas sorption analyzer. The samples were outgassed at 120 °C for 12 h before the measurements. Surface areas were calculated from the adsorption data using Langmuir and Brunauer-Emmett-Teller (BET) methods. The pore-size-distribution curves were obtained from the adsorption branches using the Barrett, Joyner, and Halenda (BJH) method. X-ray photoelectron spectroscopy (XPS) measurements were carried out by a VG ESCALAB 210 instrument equipped with a dual Mg/Al anode X-ray source, a hemispherical capacitor analyzer, and a 5 keV Ar<sup>+</sup> ion gun. All spectra were recorded by using AlK $\alpha$  (1361 eV) radiation. The electron binding energy was referenced to the C1s peak at 284.8 eV. The thermal properties of catalysts were evaluated using a METTLER TOLEDO simultaneous thermal analyzer over the temperature range from 30 to 800 °C under nitrogen atmosphere (20 mL/min) with a heating rate of 10 °C/min. Field emission scanning electron microscopy (SEM) observations were performed on a Hitachi S-4800 microscope operated at an accelerating voltage of 5.0 kV. High-resolution transmission electron microscope (HR-TEM) analysis was carried out on a Talos F200S operating at 200 kV. The aberration-corrected HAADF-STEM images were obtained on a FEI-Titan Cubed Themis G2 300 equipped with a probe corrector, with a guaranteed resolution of 80 pm and accelerating voltage of 200 kV.

**Experimental Section:** All solvents and chemicals were obtained commercially and used as received.

p-3v-PPh<sub>3</sub> monomers (340.0 mg, 1.0 mmol) were fully complexed with Co<sub>2</sub>(CO)<sub>8</sub> (34.1 mg, 0.1 mmol) in tetrahydrofuran (THF, 10.0 mL) under an argon atmosphere, which stirred for 2 h at room temperature. Then transfer the above solution to a hydrothermal reaction kettle, in which the above solution copolymerized at 100 °C for 24 h under an argon atmosphere in the presence of azobisisobutyronitrile (AIBN, 12.0 mg). After washing with THF (10.0 mL) three times and drying under vacuum at 60 °C for 6 h, brown powdered catalyst named Co<sub>2</sub>(CO)<sub>8</sub>@PPh<sub>3</sub>-1/10 were obtained. The other Co@PPh<sub>3</sub> (1/X ratio means molar ratio of Co/3v-PPh<sub>3</sub>) were prepared under the same conditions as Co<sub>2</sub>(CO)<sub>8</sub>@PPh<sub>3</sub>-1/10.

Co<sub>2</sub>(CO)<sub>8</sub>/PPh<sub>3</sub>-1/10 was made by impregnation method. First, p-3v-PPh<sub>3</sub> (340.0 mg) and AIBN (12.0 mg) were dissolved in 10 mL of THF, the solution was transferred into a kettle which was heated to 100 °C for 24 h under an argon atmosphere. The resulting solid was washed by THF (10.0 mL) three times and dried under vacuum at 60 °C for 6 h; a white solid was obtained which named PPh<sub>3</sub>. Co<sub>2</sub>(CO)<sub>8</sub> (34.1 mg, 0.1 mmol) was dissolved in 8 mL of THF under an argon

atmosphere, followed by the addition of 340 mg PPh<sub>3</sub>. After stirring at room temperature for 24 h, the brown Co<sub>2</sub>(CO)<sub>8</sub>/PPh<sub>3</sub> catalyst was obtained after filtering, washing with THF and drying under vacuum.

As a typical hydroformylation recipe, the as-prepared Co<sub>2</sub>(CO)<sub>8</sub>@PPh<sub>3</sub>-1/10 catalysts (50 mg), 1-octene (56 mg, 0.5 mmol), and THF (3.0 mL) were added into a stainless-steel autoclave (100 mL) with a magnetic stir bar. After the autoclave was sealed and purged with CO for three times, the pressure of syngas (H<sub>2</sub>/CO = 1:1) was adjusted to 4 MPa and the autoclave was put into a preheated reactor, stirring at 170 °C for 12 h. After the reaction, the autoclave was cooled to room temperature and the pressure was carefully released. Subsequently, the reaction mixture was diluted with THF (6.0 mL), and the catalyst was removed from the system by centrifugation and analyzed by gas chromatography (Shimadzu GC-2014C equipped with a HP-5 capillary column with 5 wt% phenyl groups and the FID detector). Finally, the yield and regioselectivity were obtained by GC analysis using biphenyl as the internal standard.

For recycling, a mixture of Co<sub>2</sub>(CO)<sub>8</sub>@PPh<sub>3</sub>-1/10 catalyst (50 mg), 1-octene (0.5 mmol), and THF (3.0 mL) were added into a stainless-steel autoclave (100 mL) with a magnetic stir bar. After the autoclave was sealed and purged with CO for three times, the pressure of syngas (CO/H<sub>2</sub> = 1:1) was adjusted to 4.0 MPa. Then the reaction mixture was stirred at 170 °C for 12 h or 1 h. The autoclave was cooled to room temperature and the pressure was carefully released. The reaction mixture (~ 0.2 mL) was taken out from the glass tube for analysis by gas chromatography. The catalyst was separated by centrifugation, washed with THF (10.0 mL × 3), dried under vacuum at 60 °C for 6 h and used directly for the next run.

For Hot Filtration, a mixture of Co<sub>2</sub>(CO)<sub>8</sub>@PPh<sub>3</sub>-1/10 catalyst (50 mg), 1-octene (0.5 mmol), and THF (3.0 mL) were added into a stainless-steel autoclave (100 mL) with a magnetic stir bar. After the autoclave was sealed and purged with CO for three times, the pressure of syngas (CO/H<sub>2</sub> = 1:1) was adjusted to 4.0 MPa. Then the reaction mixture was stirred at 170 °C for 1 h. The autoclave was cooled to room temperature and the pressure was carefully released. The reaction mixture (~ 0.2 mL) was taken out from the glass tube for analysis by gas chromatography. After sealing and purging with CO for 3 times, the pressure of syngas (CO/H<sub>2</sub> = 1:1) was adjusted to 4.0 MPa. Next, the reaction mixture was stirred at 170 °C for another 11 h. The autoclave was cooled to room temperature and the pressure was carefully released. Subsequently, the reaction mixture was diluted with THF (6 mL), and the catalyst was removed from the system by centrifugation and analyzed by gas chromatography. The Co contents of the used catalyst and filtrate after each run were analyzed by inductively coupled plasma-atomic emission spectrometry (ICP-AES).

## 2. Optimization of the reaction conditions

**Table S1. Catalysts used in reductive hydroformylation**

| Entry | Catalyst                                                        | Condition      |                  | Catalytic Performance    |                          | Reference                                |
|-------|-----------------------------------------------------------------|----------------|------------------|--------------------------|--------------------------|------------------------------------------|
|       |                                                                 | Pressure (Mpa) | Temperature (°C) | Fresh Calatlyst          | The third cycle          |                                          |
| 1     | fibrous Co <sub>3</sub> O <sub>4</sub>                          | 5.5            | 150              | Con. 93.0%<br>Sel. 93.0% | Con. 60.0%<br>Sel. 55.0% | Catal. Today <b>2018</b> , 309, 147-152. |
| 2     | FeCu-Co <sub>3</sub> O <sub>4</sub>                             | 7              | 150              | Con. 99.8%<br>Sel. 67.9% | -                        | FPT <b>2023</b> , 107721-107729.         |
| 3     | Co <sub>3</sub> O <sub>4</sub> -g-C <sub>3</sub> N <sub>4</sub> | 7              | 150              | Con. 99.9%<br>Sel. 77.8% | -                        | Fuel <b>2024</b> , 365, 131192-131200.   |
| 4     | CoZrP                                                           | 4              | 190              | Con. 99.9%<br>Sel. 94.5% | Con. 99.9%<br>Sel. 94.5% | J. Catal. <b>2022</b> , 408, 245-260     |
| 5     | Co <sub>2</sub> (CO) <sub>8</sub> @PPh <sub>3</sub>             | 4              | 170              | Con. 99.0%<br>Sel. 94.0% | Con. 99.0%<br>Sel. 93.5% | This work                                |

**Table S2. Screening of Temperature for the Reductive Hydroformylation of 1-octene<sup>[a], [c]</sup>**

| Entry | T (°C) | Con. (%) <sup>[b]</sup> | Sel. (%) <sup>[b]</sup> |            |               |               |
|-------|--------|-------------------------|-------------------------|------------|---------------|---------------|
|       |        |                         | Octane                  | Iso-octene | Nonanal (L/B) | Nonanol (L/B) |
| 1     | 110    | -                       | -                       | -          | -             | -             |
| 2     | 130    | 21                      | 26                      | 4          | 70 (53/47)    | -             |
| 3     | 140    | 98                      | 4                       | 1          | 91 (61/39)    | 4 (51/49)     |
| 4     | 150    | 97                      | 4                       | 5          | 80 (55/45)    | 11 (65/35)    |
| 5     | 160    | 99                      | 5                       | 2          | 3 (62/38)     | 90 (56/44)    |
| 6     | 170    | >99                     | 4                       | <1         | 2 (54/46)     | 94 (63/37)    |
| 8     | 180    | >99                     | 6                       | 3          | 23 (61/39)    | 68 (56/44)    |

[a] Reaction conditions: 1-octene (0.5 mmol), CO/H<sub>2</sub> = 2/2 MPa, Co<sub>2</sub>(CO)<sub>8</sub>@PPh<sub>3</sub>-1/10 (50 mg), THF (3 mL), 12 h.

[b] Determined by GC analysis using biphenyl as the internal standard for GC yield.

[c] The value for the branched isomers is based on the mixture of all iso-isomers.

**Table S3. Screening of the pressure and the ratio of CO/H<sub>2</sub> for the Reductive Hydroformylation of 1-octene<sup>[a], [c]</sup>**

| Entry | H <sub>2</sub> /CO (MPa) | Con. (%) <sup>[b]</sup> | Sel. (%) <sup>[b]</sup> |            |               |               |
|-------|--------------------------|-------------------------|-------------------------|------------|---------------|---------------|
|       |                          |                         | Octane                  | Iso-octene | Nonanal (L/B) | Nonanol (L/B) |
| 1     | 1/1                      | 97                      | 8                       | 3          | 1 (56/44)     | 88 (58/42)    |
| 2     | 2/2                      | >99                     | 4                       | <1         | 1 (54/46)     | 94 (63/37)    |
| 3     | 1/3                      | >99                     | 5                       | <1         | 2 (61/39)     | 92 (59/41)    |
| 4     | 3/1                      | >99                     | 9                       | <1         | 1 (60/40)     | 88 (51/49)    |
| 5     | 3/3                      | >99                     | 4                       | <1         | 1 (48/52)     | 94 (53/47)    |

[a] Reaction conditions: 1-octene (0.5 mmol), Co<sub>2</sub>(CO)<sub>8</sub>@PPh<sub>3</sub>-1/10 (50 mg), THF (3 mL), 170 °C for 12 h.

[b] Determined by GC analysis using biphenyl as the internal standard for GC yield.<sup>9</sup>

[c] The value for the branched isomers is based on the mixture of all iso-isomers.

**Table S4. Screening of Solvent for the Reductive Hydroformylation of 1-octene<sup>[a], [c]</sup>**

| Entry | Solvent | Con. (%) <sup>[b]</sup> | Sel. (%) <sup>[b]</sup> |            |               |               |
|-------|---------|-------------------------|-------------------------|------------|---------------|---------------|
|       |         |                         | Octane                  | Iso-octene | Nonanal (L+B) | Nonanol (L+B) |
| 1     | Toluene | 90                      | 10                      | 5          | 26            | 51            |
| 2     | Anisole | 75                      | 6                       | 4          | 69            | 21            |
| 3     | THF     | >99                     | 4                       | <1         | 1             | 94            |
| 4     | ACN     | 83                      | 9                       | 7          | 57            | 27            |
| 5     | NMP     | 8                       | 45                      | 55         | -             | -             |

[a] Reaction conditions: 1-octene (0.5 mmol), CO/H<sub>2</sub> = 2/2 MPa, Co<sub>2</sub>(CO)<sub>8</sub>@PPh<sub>3</sub>-1/10 (50 mg), 170 °C for 12 h.

[b] Determined by GC analysis using biphenyl as the internal standard for GC yield.

[c] The value for the branched isomers is based on the mixture of all iso-isomers.

**Table S5. Screening of Time for the Reductive Hydroformylation of 1-octene<sup>[a], [c]</sup>**

| Entry | Time (h) | Con. (%) <sup>[b]</sup> | Sel. (%) <sup>[b]</sup> |            |               |               |
|-------|----------|-------------------------|-------------------------|------------|---------------|---------------|
|       |          |                         | Octane                  | Iso-octene | Nonanal (L/B) | Nonanol (L/B) |
| 1     | 1        | 59                      | 7                       | 15         | 70 (63/37)    | 8 (60/40)     |
| 2     | 2        | 88                      | 5                       | 12         | 66 (54/46)    | 17 (63/37)    |
| 3     | 3        | 96                      | 4                       | 10         | 54 (49/51)    | 32 (59/41)    |
| 4     | 6        | 98                      | 4                       | 6          | 45 (44/56)    | 45 (53/48)    |
| 5     | 9        | 99                      | 4                       | 1          | 7 (43/57)     | 88 (51/49)    |
| 6     | 12       | >99                     | 4                       | <1         | 1 (54/46)     | 94 (63/37)    |

7            24            >99            4            <1            1 (50/50)            94 (66/34)

[a] Reaction conditions: 1-octene (0.5 mmol), CO/H<sub>2</sub> = 2/2 MPa, Co<sub>2</sub>(CO)<sub>8</sub>@PPh<sub>3</sub>-1/10 (50 mg), THF (3 mL), 170 °C.

[b] Determined by GC analysis using biphenyl as the internal standard for GC yield.

[c] The value for the branched isomers is based on the mixture of all iso-isomers.

**Table S6. Catalyst Screening for the Hydroformylation of 1-octene** <sup>[a], [c]</sup>

| Entry | Catalysts                                                 | Con. (%) <sup>[b]</sup> | Sel. (%) <sup>[b]</sup> |            |               |               |
|-------|-----------------------------------------------------------|-------------------------|-------------------------|------------|---------------|---------------|
|       |                                                           |                         | Octane                  | Iso-octene | Nonanal (L/B) | Nonanol (L/B) |
| 1     | Co <sub>2</sub> (CO) <sub>8</sub> @PPh <sub>3</sub> -1/10 | 96                      | 4                       | 1          | 91 (61/39)    | 4 (51/49)     |
| 2     | Co <sub>2</sub> (CO) <sub>8</sub> /PPh <sub>3</sub> -1/10 | 89                      | 11                      | 2          | 36 (44/56)    | 51 (52/48)    |
| 3     | Co(acac) <sub>2</sub> @PPh <sub>3</sub> -1/10             | 9                       | 9                       | 5          | 29 (38/62)    | 57 (66/34)    |
| 4     | CoCl <sub>2</sub> @PPh <sub>3</sub> -1/10                 | n. r.                   | -                       | -          | -             | -             |
| 5     | Co(NO <sub>3</sub> ) <sub>2</sub> @PPh <sub>3</sub> -1/10 | n. r.                   | -                       | -          | -             | -             |
| 6     | Co <sub>2</sub> (CO) <sub>8</sub> @PPh <sub>3</sub> -1/5  | 96                      | 8                       | 1          | 84 (45/55)    | 7 (64/36)     |
|       | Co <sub>2</sub> (CO) <sub>8</sub> @PPh <sub>3</sub> -1/15 | 89                      | 10                      | 4          | 74 (48/52)    | 12 (55/45)    |

[a] Reaction conditions: 1-octene (0.5 mmol), CO/H<sub>2</sub> = 3/3 MPa, Catalyst (50 mg), THF (3 mL), 140 °C for 12 h.

[b] Determined by GC analysis using biphenyl as the internal standard for GC yield.

[c] The value for the branched isomers is based on the mixture of all iso-isomers.

**Table S7. Screening of the Pressure and the Ratio of CO/H<sub>2</sub> for the Hydroformylation of 1-octene** <sup>[a], [c]</sup>

| Entry | H <sub>2</sub> /CO (MPa) | Con. (%) <sup>[b]</sup> | Sel. (%) <sup>[b]</sup> |            |               |               |
|-------|--------------------------|-------------------------|-------------------------|------------|---------------|---------------|
|       |                          |                         | Octane                  | Iso-octene | Nonanal (L/B) | Nonanol (L/B) |
| 1     | 1/1                      | 91                      | 7                       | 8          | 82 (34/66)    | 3 (35/65)     |
| 2     | 2/2                      | 95                      | 5                       | 4          | 83 (62/38)    | 8 (41/59)     |
| 3     | 1/3                      | 93                      | 5                       | 6          | 87 (53/47)    | 7 (58/42)     |
| 4     | 3/1                      | 96                      | 9                       | -          | 81 (55/45)    | 10 (43/57)    |
| 5     | 3/3                      | 96                      | 4                       | 1          | 91 (61/39)    | 4 (51/49)     |
| 6     | 1/5                      | 95                      | 4                       | 1          | 91 (58/42)    | 4 (46/54)     |

[a] Reaction conditions: 1-octene (0.5 mmol), Co<sub>2</sub>(CO)<sub>8</sub>@PPh<sub>3</sub>-1/10 (50 mg), THF (3 mL), 140 °C for 12 h.

[b] Determined by GC analysis using biphenyl as the internal standard for GC yield.

[c] The value for the branched isomers is based on the mixture of all iso-isomers.

**Table S8. Screening of Solvent for the Hydroformylation of 1-octene<sup>[a], [c]</sup>**

| Entry | Solvent            | Con. (%) [b] | Sel. (%) <sup>[b]</sup> |            |         |         |
|-------|--------------------|--------------|-------------------------|------------|---------|---------|
|       |                    |              | Octane                  | Iso-octene | Nonanal | Nonanol |
| 1     | Toluene            | 81           | 12                      | 7          | 53      | 28      |
| 2     | Anisole            | 69           | 9                       | 4          | 81      | 6       |
| 3     | THF                | 96           | 4                       | 1          | 91      | 4       |
| 4     | CH <sub>3</sub> CN | 75           | 10                      | 5          | 62      | 23      |
| 5     | NMP                | n. r.        | -                       | -          | -       | -       |

[a] Reaction conditions: 1-octene (0.5 mmol), CO/H<sub>2</sub> = 3/3 MPa, Co<sub>2</sub>(CO)<sub>8</sub>@PPh<sub>3</sub>-1/10 (50 mg), 140 °C for 12 h.

[b] Determined by GC analysis using biphenyl as the internal standard for GC yield.

[c] The value for the branched isomers is based on the mixture of all iso-isomers.

**Table S9. Screening of Time for the Hydroformylation of 1-octene<sup>[a], [c]</sup>**

| Entry | Time (h) | Con. (%) [b] | Sel. (%) <sup>[b]</sup> |             |            |            |
|-------|----------|--------------|-------------------------|-------------|------------|------------|
|       |          |              | Alkanes                 | Iso-olefins | Aldehydes  | Alcohols   |
| 1     | 3        | 17           | 22                      | 28          | 50 (62/38) | -          |
| 2     | 6        | 72           | 5                       | 12          | 80 (56/44) | 3 (48/52)  |
| 3     | 9        | 84           | 4                       | 11          | 81 (51/49) | 4 (38/62)  |
| 4     | 12       | 96           | 4                       | 1           | 91 (61/39) | 4 (51/49)  |
| 5     | 24       | >99          | 4                       | <1          | 75 (54/55) | 20 (57/43) |

[a] Reaction conditions: 1-octene (0.5 mmol), CO/H<sub>2</sub> = 3/3 MPa, Catalyst (50 mg), THF (3 mL), 140 °C.

[b] Determined by GC analysis using biphenyl as the internal standard for GC yield.

[c] The value for the branched isomers is based on the mixture of all iso-isomers.

### 3. Characterization Result of Catalyst

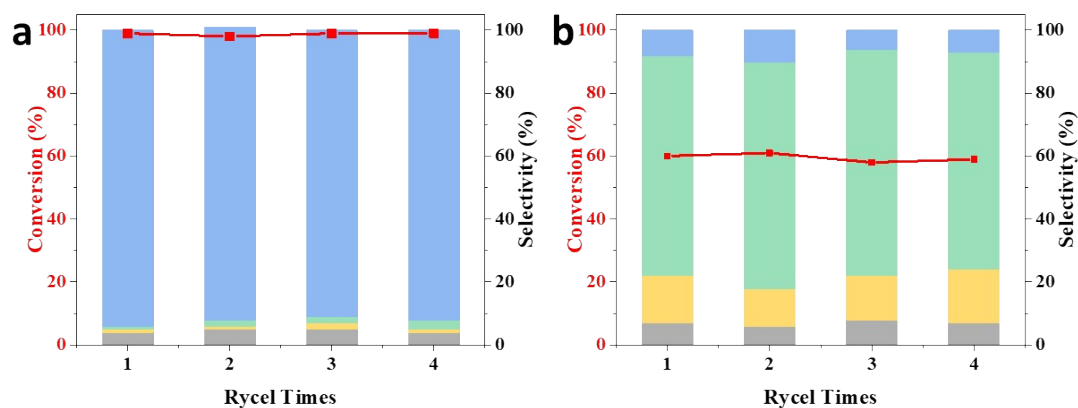

**Figure S1. Stability tests of the 1-octene reductive hydroformylation reaction over  $\text{Co}_2(\text{CO})_8@P\text{Ph}_3-1/10$  catalyst. (a) at full conversion of 1-octene; (b) at relatively low conversions (59%-61%) of 1-octene.**

**Table S10. Co Contents in the Fresh and Recycled Catalysts, and in the Filtration after Each Cycle.**

| Entry                                                         | Co contents in the catalysts  |        |
|---------------------------------------------------------------|-------------------------------|--------|
|                                                               | Co contents in the filtration |        |
|                                                               | (wt.%)                        | (wt.%) |
| The fresh $\text{Co}_2(\text{CO})_8@P\text{Ph}_3-1/10$        | 3.27                          | -      |
| The 1st recycled $\text{Co}_2(\text{CO})_8@P\text{Ph}_3-1/10$ | 3.23                          | 1.24   |
| The 2nd recycled $\text{Co}_2(\text{CO})_8@P\text{Ph}_3-1/10$ | 3.19                          | 1.21   |
| The 3rd recycled $\text{Co}_2(\text{CO})_8@P\text{Ph}_3-1/10$ | 3.16                          | 0.93   |
| The 4th recycled $\text{Co}_2(\text{CO})_8@P\text{Ph}_3-1/10$ | 3.15                          | 0.13   |

[a] Co contents were determined by ICP-AES.



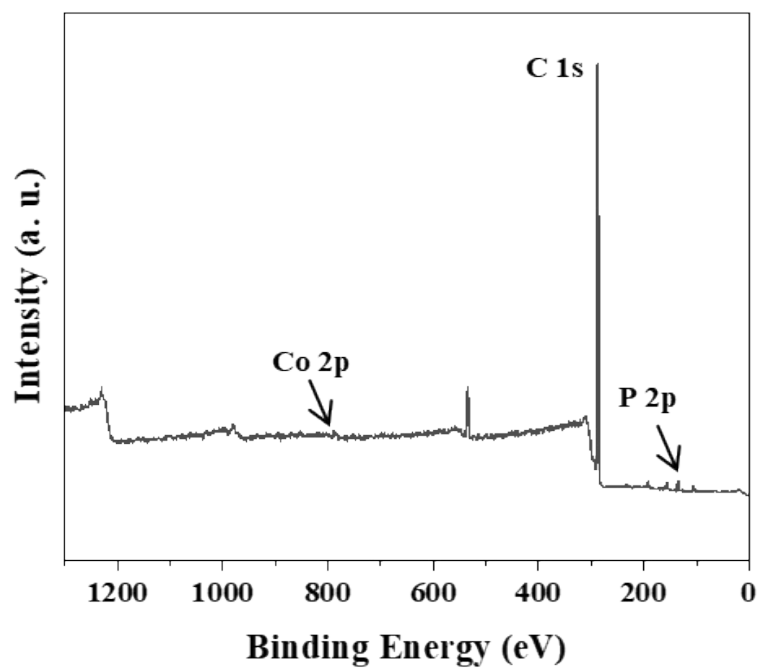

Figure S2. XPS wide-scan spectra of  $\text{Co}_2(\text{CO})_8@P\text{Ph}_3-1/10$ .

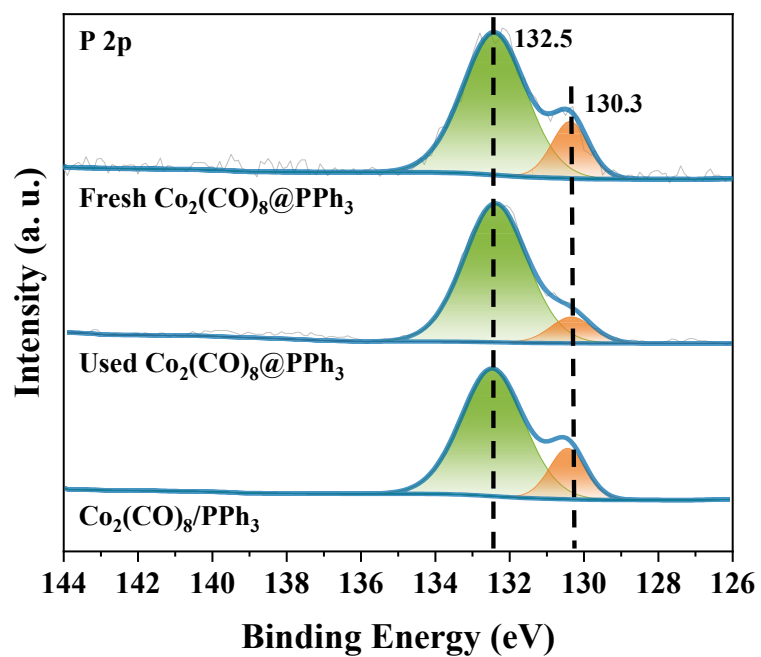

Figure S3. P 2p XPS spectra of fresh  $\text{Co}_2(\text{CO})_8@P\text{Ph}_3-1/10$  and used  $\text{Co}_2(\text{CO})_8@P\text{Ph}_3-1/10$ .

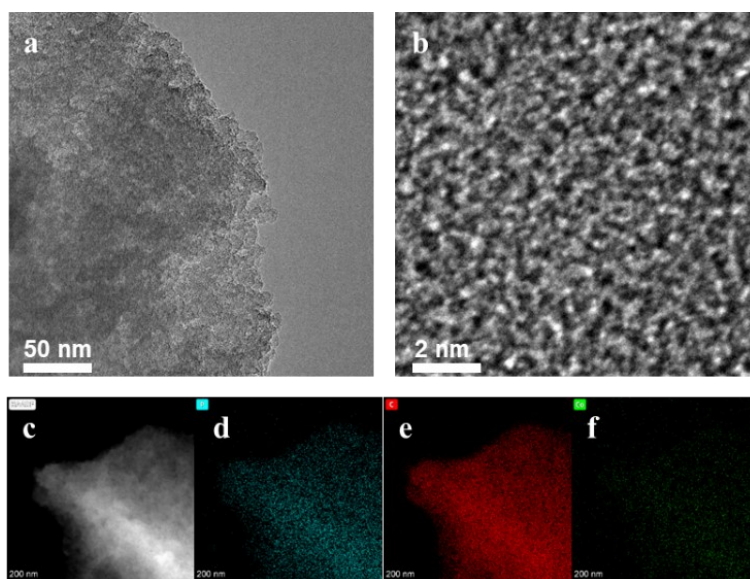

Figure S4. Morphology of used  $\text{Co}_2(\text{CO})_8@\text{PPh}_3\text{-1/10}$ . (a) TEM. (b) HRTEM, (c-f) EDS mapping.

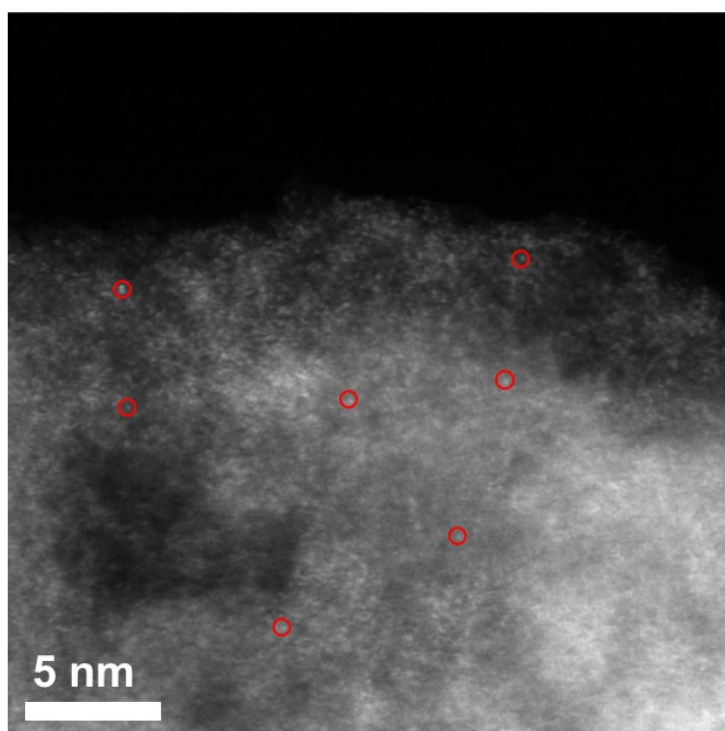

Figure S5. HAADF-STEM image of used  $\text{Co}_2(\text{CO})_8@\text{PPh}_3\text{-1/10}$ .

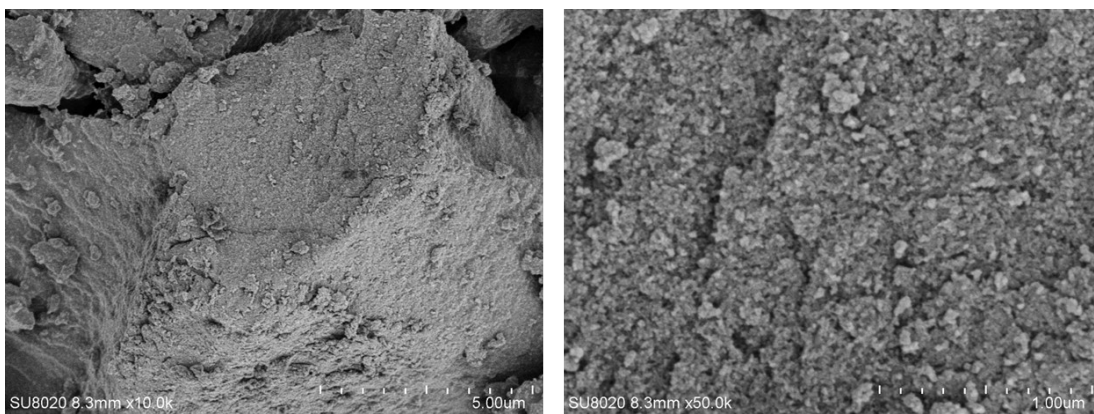

Figure S6. SEM images of fresh  $\text{Co}_2(\text{CO})_8@P\text{Ph}_3-1/10$ .

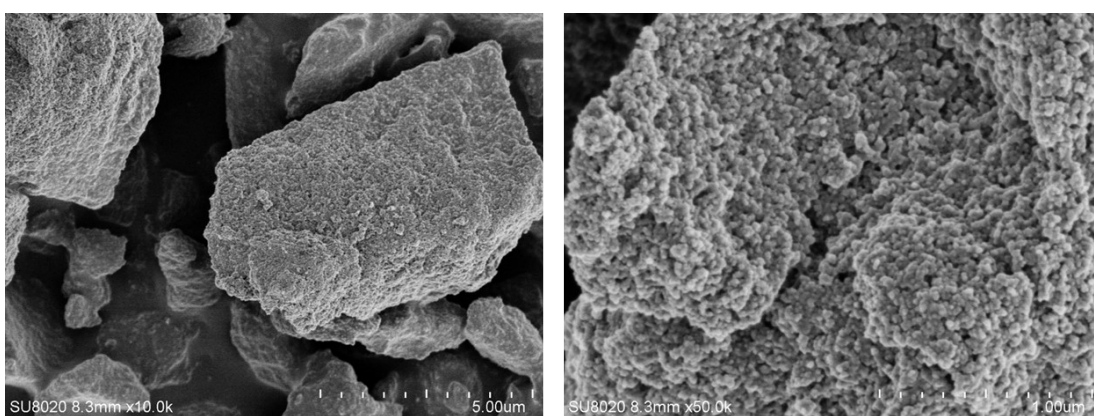

Figure S7. SEM images of used  $\text{Co}_2(\text{CO})_8@P\text{Ph}_3-1/10$ .

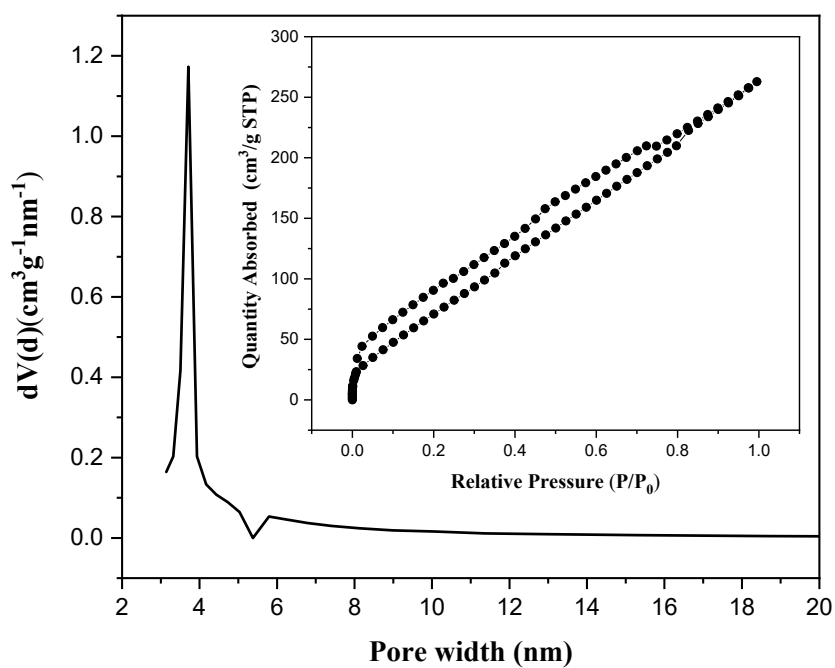

Figure S8.  $\text{N}_2$  adsorption–desorption analysis of fresh  $\text{Co}_2(\text{CO})_8@P\text{Ph}_3-1/10$ .

**Table S11. The information of BET of Catalysts**

| Samples                                            | Surface area ( $\text{m}^2 \text{g}^{-1}$ ) | Pore volume ( $\text{cm}^3 \text{g}^{-1}$ ) | Average pore Radius (nm) |
|----------------------------------------------------|---------------------------------------------|---------------------------------------------|--------------------------|
| $\text{Co}_2(\text{CO})_8@\text{PPh}_3$ -1/10      | 355.270                                     | 0.4066                                      | 4.578                    |
| $\text{Co}_2(\text{CO})_8/\text{PPh}_3$ -1/10      | 364.359                                     | 0.3760                                      | 4.128                    |
| Used $\text{Co}_2(\text{CO})_8@\text{PPh}_3$ -1/10 | 411.581                                     | 0.4698                                      | 4.566                    |
| $\text{PPh}_3$                                     | 345.615                                     | 0.4240                                      | 4.866                    |

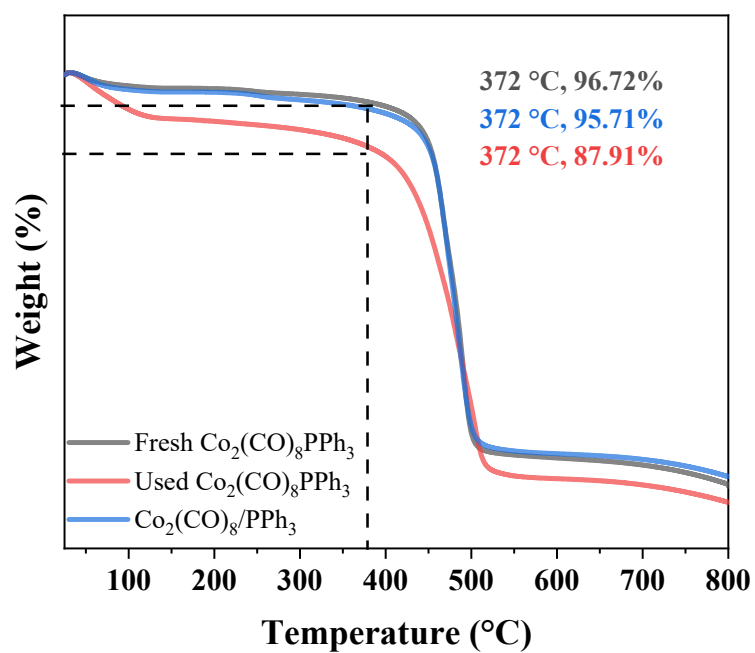

**Figure S9. TG analysis of catalysts.**

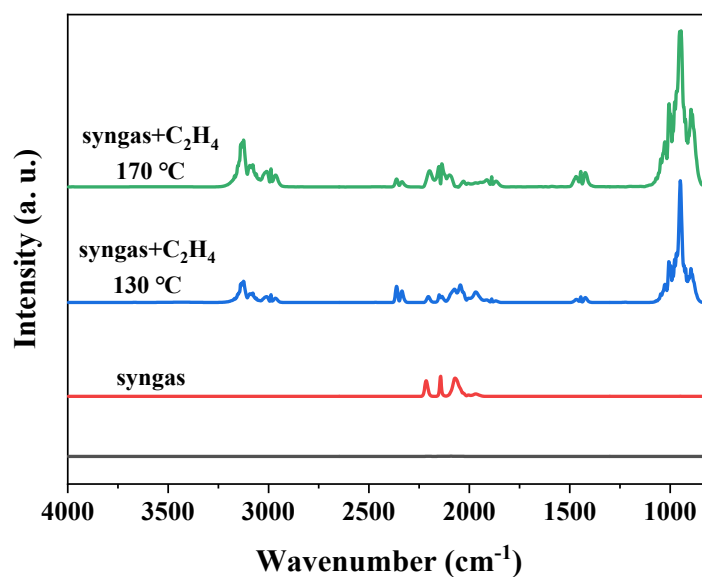

Figure S10. In situ DRIFTS spectra of  $\text{Co}_2(\text{CO})_8@\text{PPh}_3\text{-1/10}$  by introducing 1 MPa syngas and ethylene at 130 and 170 °C.

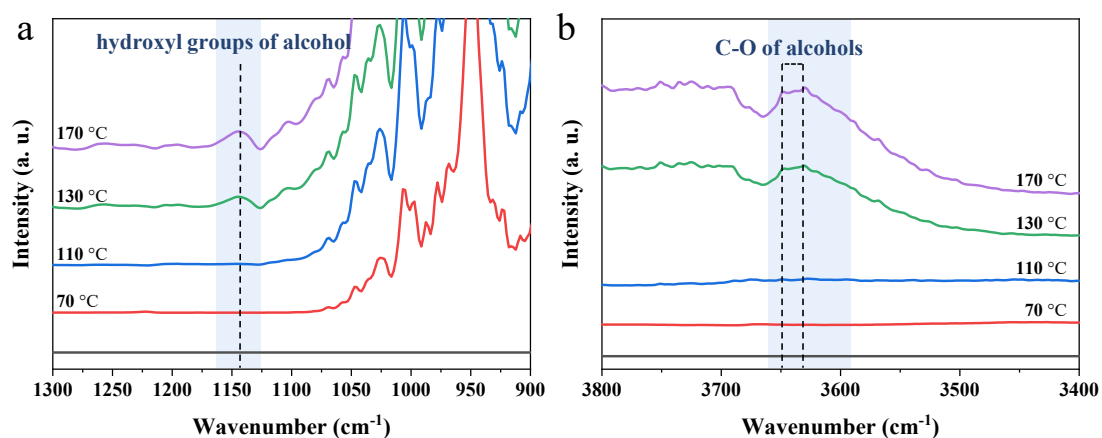

Figure S11. In situ DRIFTS spectra of  $\text{Co}_2(\text{CO})_8@\text{PPh}_3\text{-1/10}$  by introducing 1 MPa syngas and ethylene as the reaction gas at different temperature.

## 4. Representative GC Data and NMR data of the Products

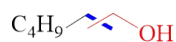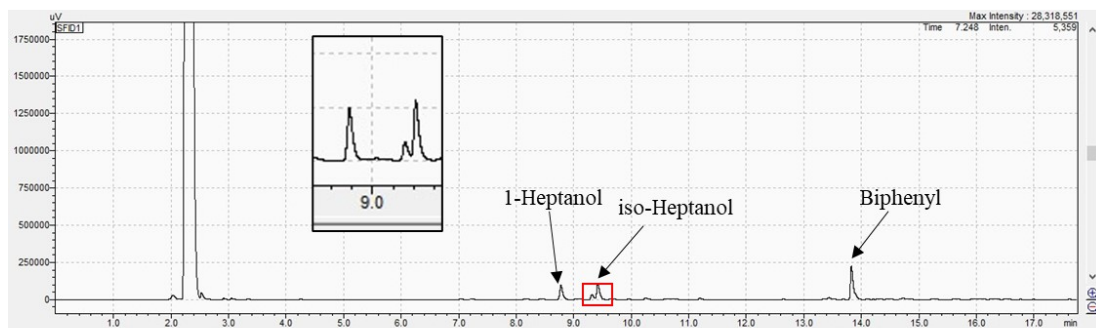

| 峰号 | 保留时间   | 面积     | 高度     | 标记 | 浓度    | 浓度单位 | 化合物ID号 | 面积%    | 面积比     |
|----|--------|--------|--------|----|-------|------|--------|--------|---------|
| 1  | 8.779  | 345729 | 96559  | M  | 0.000 |      |        | 21.555 | 0       |
| 2  | 9.419  | 481835 | 110067 | M  | 0.000 |      |        | 30.041 | 0       |
| 3  | 13.828 | 776343 | 220270 | M  | 0.000 | mg   |        | 48.403 | 1.00000 |

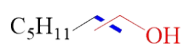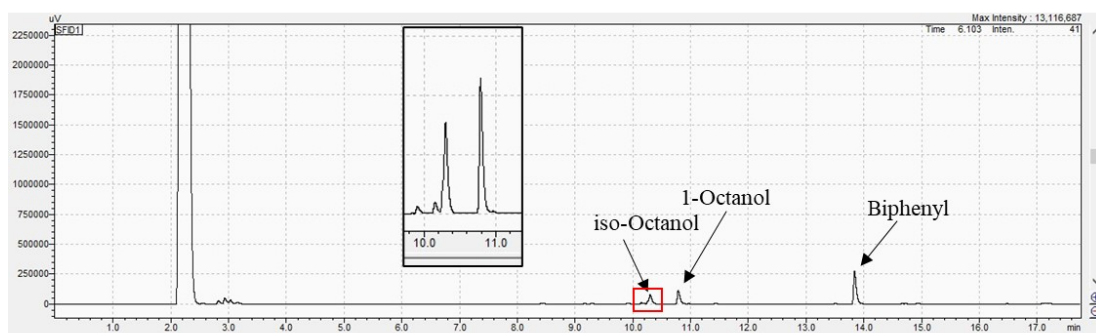

| 峰号 | 保留时间   | 面积     | 高度     | 标记 | 浓度     | 浓度单位 | 化合物ID号 | 面积%    |
|----|--------|--------|--------|----|--------|------|--------|--------|
| 1  | 10.300 | 326365 | 75749  | M  | 0.000  |      |        | 20.492 |
| 2  | 10.787 | 370566 | 113016 | M  | 82.408 | mg   | 4      | 23.267 |
| 3  | 13.840 | 895736 | 276674 | M  | 0.000  | mg   | 6      | 56.241 |

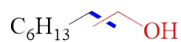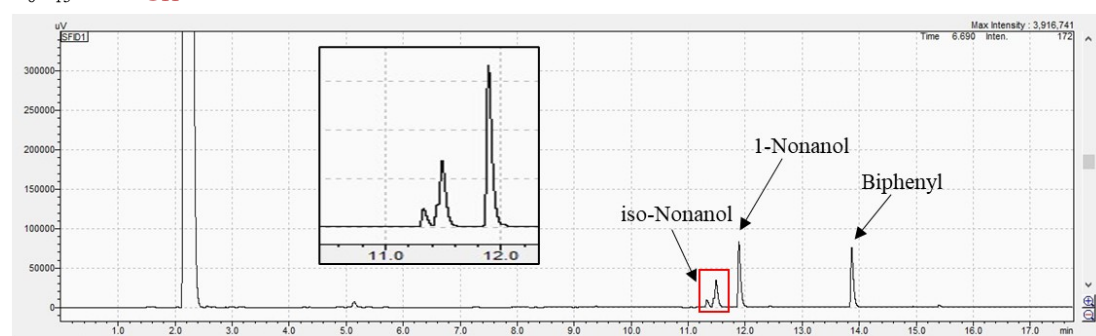

| 峰号 | 保留时间   | 面积     | 高度    | 标记 | 浓度     | 浓度单位 | 化合物ID号 | 面积%    |
|----|--------|--------|-------|----|--------|------|--------|--------|
| 1  | 11.490 | 159550 | 33511 | M  | 35.481 | mg   | 4      | 23.918 |
| 2  | 11.890 | 268296 | 82681 | M  | 49.778 | mg   | 5      | 40.221 |
| 3  | 13.868 | 239212 | 75534 | M  | 0.000  | mg   | 6      | 35.861 |

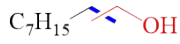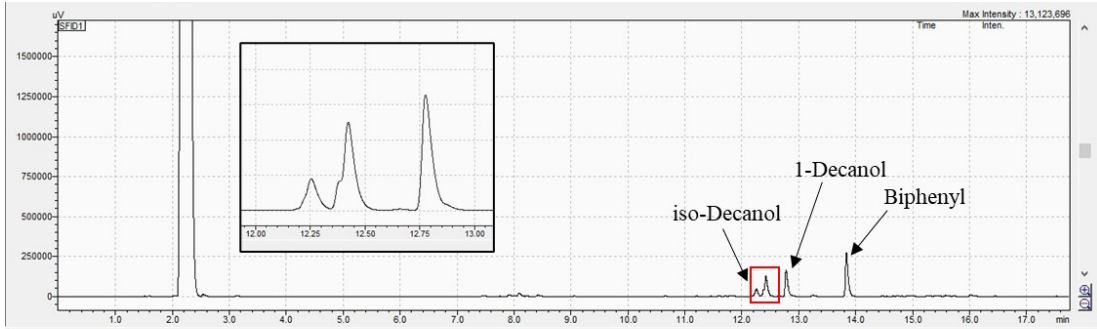

| 峰号 | 保留时间   | 面积     | 高度     | 标记 | 浓度      | 浓度单位 | 化合物ID号 | 面积%    |
|----|--------|--------|--------|----|---------|------|--------|--------|
| 1  | 12.423 | 649413 | 122921 | M  | 120.487 | mg   | 5      | 31.506 |
| 2  | 12.777 | 535858 | 162357 | M  | 0.000   |      |        | 25.997 |
| 3  | 13.838 | 875996 | 271817 | M  | 0.000   | mg   | 6      | 42.498 |

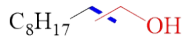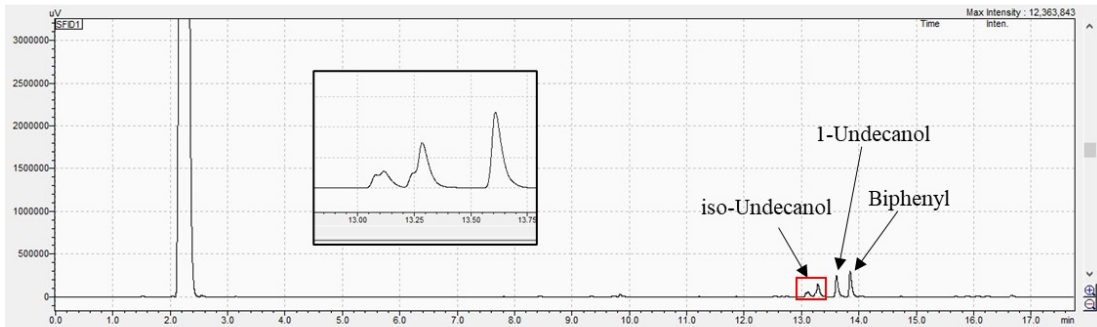

| 峰号 | 保留时间   | 面积     | 高度     | 标记 | 浓度    | 浓度单位 | 化合物ID号 | 面积%    |
|----|--------|--------|--------|----|-------|------|--------|--------|
| 1  | 13.286 | 823826 | 146379 | M  | 0.000 | mg   | 6      | 32.641 |
| 2  | 13.609 | 793631 | 245070 | M  | 0.000 | mg   |        | 31.445 |
| 3  | 13.847 | 906453 | 291992 | M  | 0.000 | mg   | 6      | 35.915 |

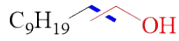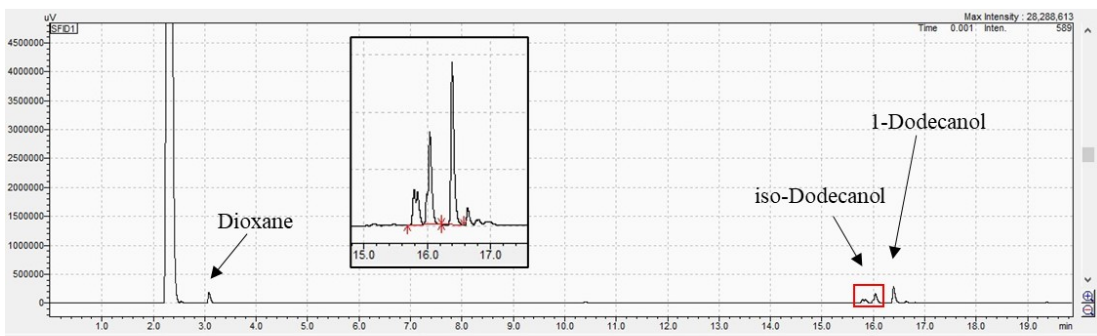

| 峰号 | 保留时间   | 面积      | 高度     | 标记 | 浓度    | 浓度单位 | 化合物ID号 | 面积%    |
|----|--------|---------|--------|----|-------|------|--------|--------|
| 1  | 3.082  | 679985  | 181086 | M  | 0.000 |      |        | 22.765 |
| 2  | 16.040 | 1028536 | 160994 | M  | 0.000 |      |        | 40.371 |
| 3  | 16.393 | 939204  | 283650 | M  | 0.000 |      |        | 36.864 |



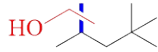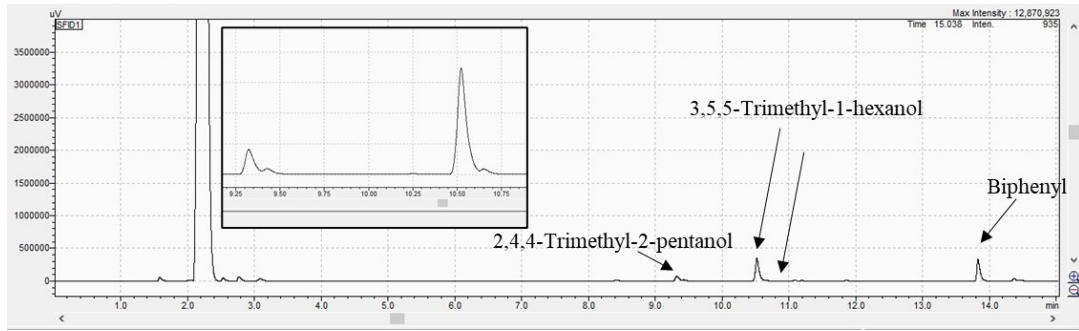

| 峰号 | 保留时间   | 面积      | 高度     | 标记 | 浓度       | 浓度单位 | 化合物ID号 | 面积%    |
|----|--------|---------|--------|----|----------|------|--------|--------|
| 1  | 9.323  | 349529  | 80537  | M  | 0.000    |      |        | 13.096 |
| 2  | 10.523 | 1288978 | 344540 | M  | 0.000    |      |        | 48.295 |
| 3  | 13.832 | 1030480 | 327186 | M  | 0.000 mg |      | 6      | 38.609 |

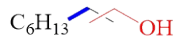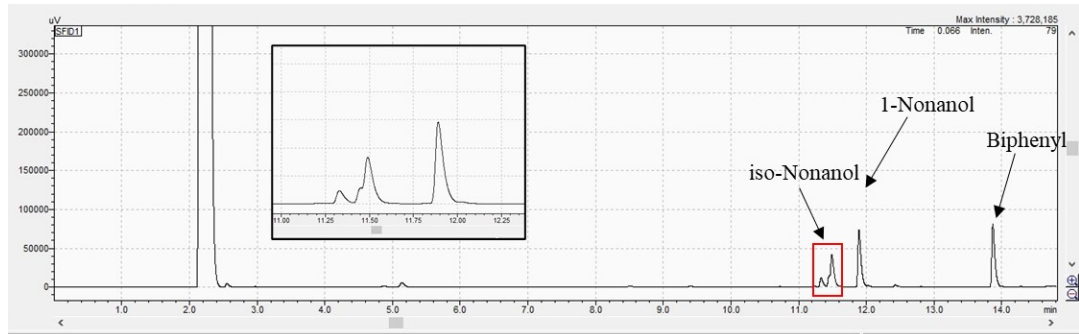

| 峰号 | 保留时间   | 面积     | 高度    | 标记 | 浓度        | 浓度单位 | 化合物ID号 | 面积%    |
|----|--------|--------|-------|----|-----------|------|--------|--------|
| 1  | 11.491 | 194801 | 40875 | M  | 43.321 mg |      | 4      | 28.750 |
| 2  | 11.891 | 229663 | 71937 | M  | 42.610 mg |      | 5      | 33.896 |
| 3  | 13.869 | 253093 | 80388 | M  | 0.000 mg  |      | 6      | 37.354 |

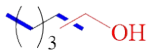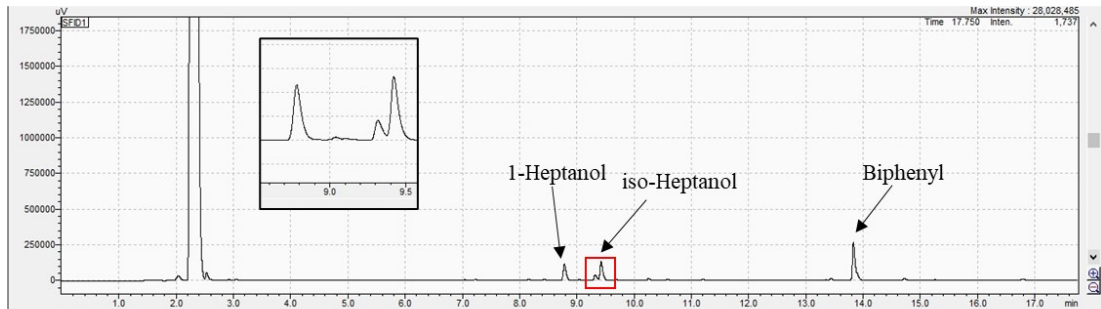

| 峰号 | 保留时间   | 面积     | 高度     | 标记 | 浓度       | 浓度单位 | 化合物ID号 | 面积%    | 面积比     |
|----|--------|--------|--------|----|----------|------|--------|--------|---------|
| 1  | 8.781  | 408647 | 115401 | M  | 0.000    |      |        | 21.072 | 0       |
| 2  | 9.422  | 593106 | 132458 | M  | 0.000    |      |        | 30.584 | 0       |
| 3  | 13.830 | 937534 | 265536 | M  | 0.000 mg |      | 6      | 48.344 | 1.00000 |



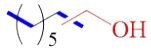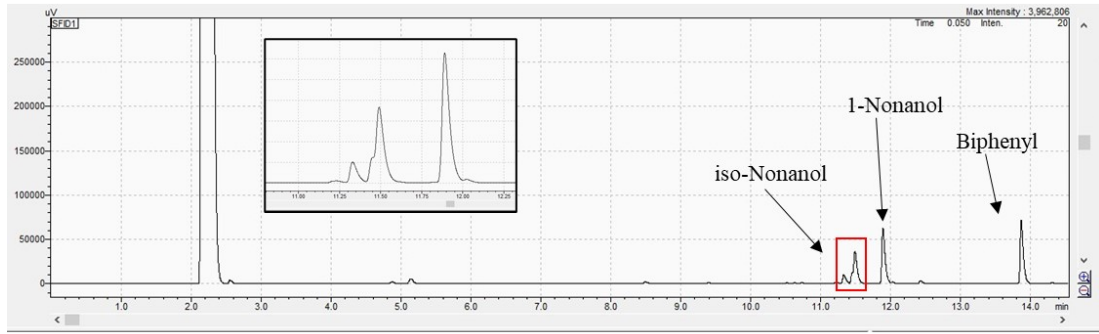

| 峰号 | 保留时间   | 面积     | 高度    | 标记 | 浓度     | 浓度单位 | 化合物ID号 | 面积%    |
|----|--------|--------|-------|----|--------|------|--------|--------|
| 1  | 11.490 | 171411 | 35938 | M  | 38.119 | mg   | 4      | 28.685 |
| 2  | 11.890 | 203818 | 62223 | M  | 37.815 | mg   | 5      | 33.990 |
| 3  | 13.868 | 224416 | 70731 | M  | 0.000  | mg   | 6      | 37.425 |

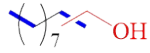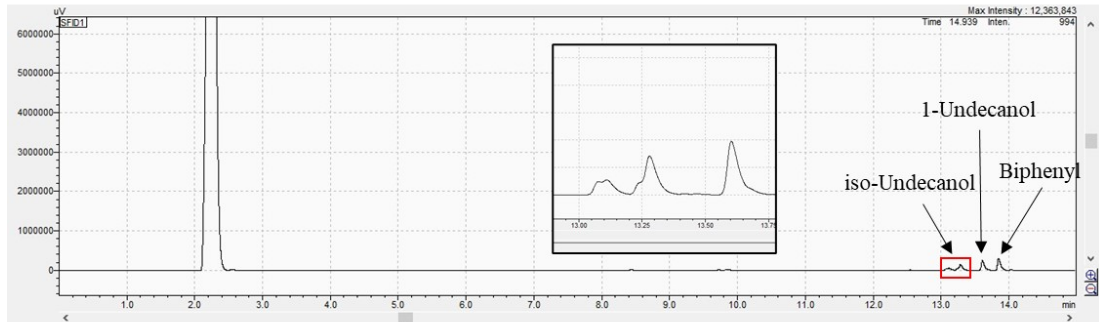

| 峰号 | 保留时间   | 面积     | 高度     | 标记 | 浓度    | 浓度单位 | 化合物ID号 | 面积%    |
|----|--------|--------|--------|----|-------|------|--------|--------|
| 1  | 13.280 | 778857 | 138749 | M  | 0.000 | mg   | 6      | 33.087 |
| 2  | 13.603 | 631711 | 191956 | M  | 0.000 | mg   | 6      | 26.836 |
| 3  | 13.842 | 943382 | 296602 | M  | 0.000 | mg   | 6      | 40.077 |

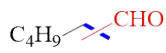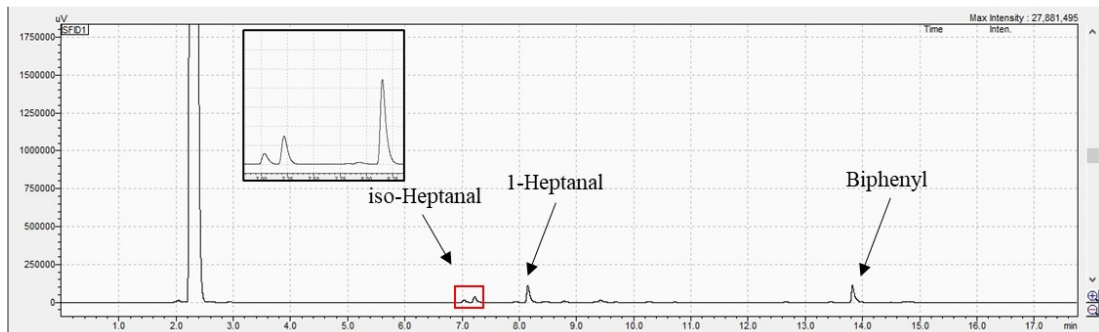

| 峰号 | 保留时间   | 面积     | 高度     | 标记 | 浓度    | 浓度单位 | 化合物ID号 | 面积%    | 面积比     |
|----|--------|--------|--------|----|-------|------|--------|--------|---------|
| 1  | 7.218  | 198179 | 36812  | M  | 0.000 |      |        | 19.417 | 0       |
| 2  | 8.151  | 408769 | 110553 | M  | 0.000 |      |        | 40.051 | 0       |
| 3  | 13.826 | 413676 | 110305 | M  | 0.000 | mg   | 6      | 40.532 | 1.00000 |

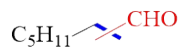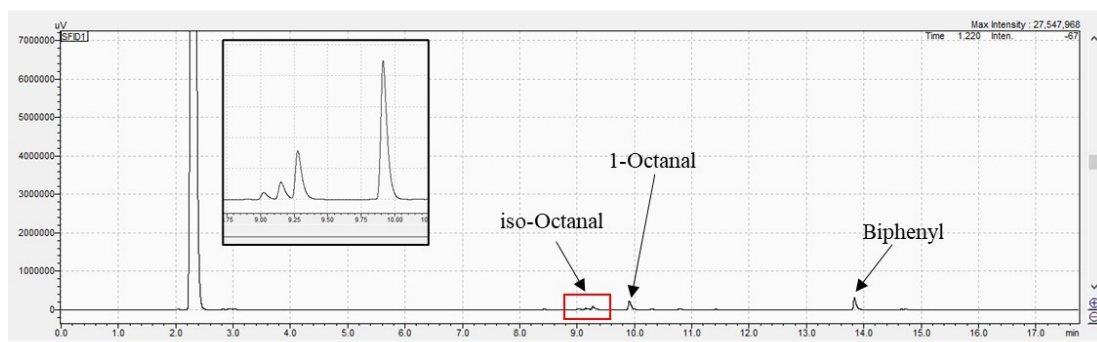

| 峰号 | 保留时间   | 面积     | 高度     | 标记 | 浓度       | 浓度单位 | 化合物ID号 | 面积%    |
|----|--------|--------|--------|----|----------|------|--------|--------|
| 1  | 9.277  | 404819 | 77957  | M  | 0.000    |      |        | 19.165 |
| 2  | 9.912  | 735170 | 221695 | M  | 0.000    |      |        | 34.805 |
| 3  | 13.837 | 972258 | 301682 | M  | 0.000 mg |      | 6      | 46.030 |

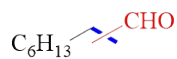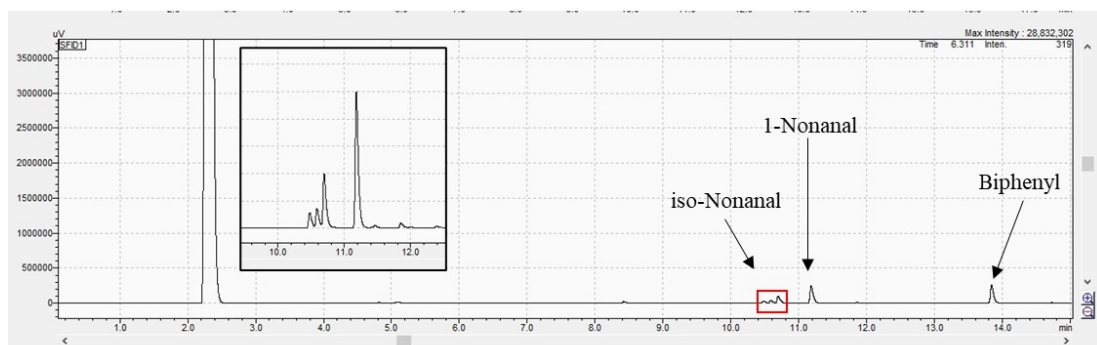

| 峰号 | 保留时间   | 面积     | 高度     | 标记 | 浓度      | 浓度单位 | 化合物ID号 | 面积%    |
|----|--------|--------|--------|----|---------|------|--------|--------|
| 1  | 10.696 | 526519 | 98852  | M  | 117.090 | mg   | 4      | 24.301 |
| 2  | 11.181 | 805300 | 248530 | M  | 179.087 | mg   | 4      | 37.169 |
| 3  | 13.837 | 834798 | 258872 | M  | 0.000   | mg   | 6      | 38.530 |

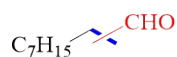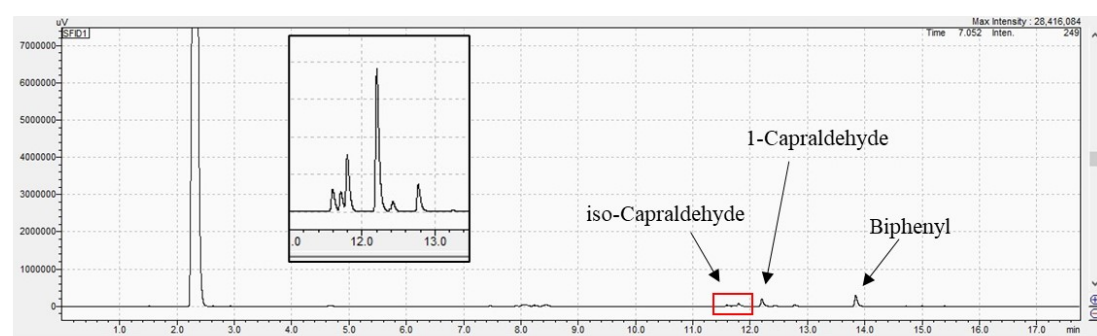

| 峰号 | 保留时间   | 面积     | 高度     | 标记 | 浓度      | 浓度单位 | 化合物ID号 | 面积%    | 面积比      |
|----|--------|--------|--------|----|---------|------|--------|--------|----------|
| 1  | 11.797 | 423257 | 75293  | M  | 78.528  | mg   | 5      | 21.103 | 0.434756 |
| 2  | 12.203 | 608875 | 189295 | M  | 112.966 | mg   | 5      | 30.357 | 0.625417 |
| 3  | 13.842 | 973550 | 300884 | M  | 0.000   | mg   | 6      | 48.540 | 1.00000  |

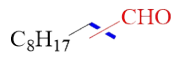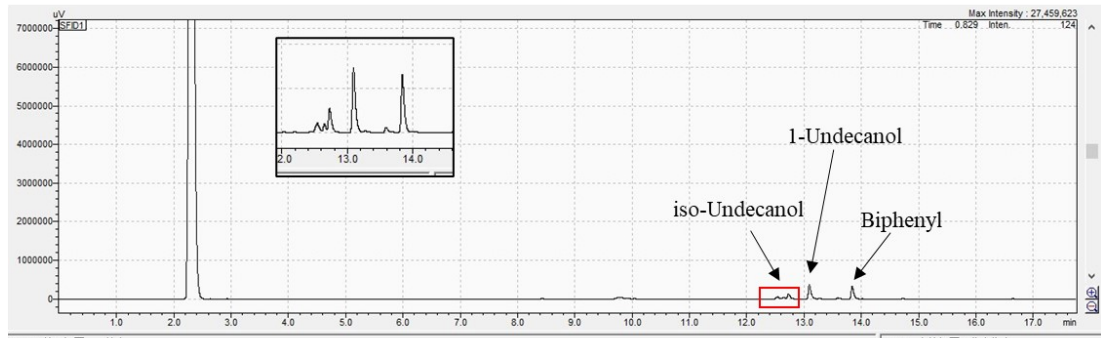

| 峰号 | 保留时间   | 面积      | 高度     | 标记 | 浓度    | 浓度单位 | 化合物ID号 | 面积%    |
|----|--------|---------|--------|----|-------|------|--------|--------|
| 1  | 12.728 | 767074  | 133860 | M  | 0.000 |      |        | 25.643 |
| 2  | 13.093 | 1184373 | 367869 | M  | 0.000 |      |        | 39.593 |
| 3  | 13.839 | 1039955 | 325647 | M  | 0.000 | mg   | 6      | 34.765 |

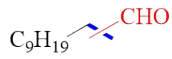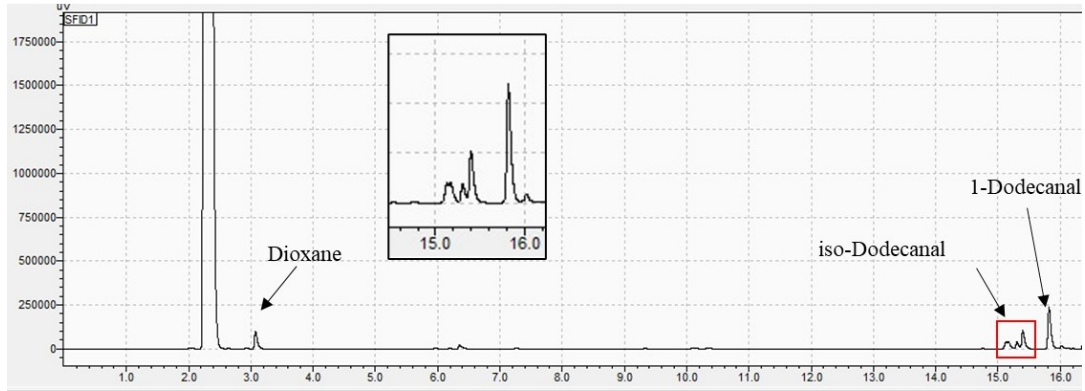

| 峰号 | 保留时间   | 面积     | 高度     | 标记 | 浓度    | 浓度单位 | 化合物ID号 | 面积%    | 面积比 |
|----|--------|--------|--------|----|-------|------|--------|--------|-----|
| 1  | 3.073  | 312331 | 97693  | M  | 0.000 |      |        | 16.779 | 0   |
| 2  | 15.399 | 707311 | 104080 | M  | 0.000 |      |        | 37.999 | 0   |
| 3  | 15.820 | 841775 | 236255 | M  | 0.000 |      |        | 45.222 | 0   |

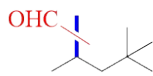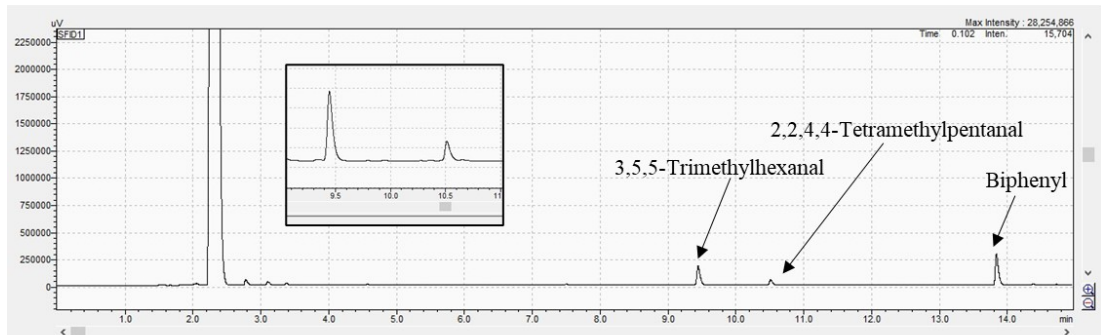

| 峰号 | 保留时间   | 面积     | 高度     | 标记 | 浓度    | 浓度单位 | 化合物ID号 | 面积%    |
|----|--------|--------|--------|----|-------|------|--------|--------|
| 1  | 9.444  | 582052 | 172966 | M  | 0.000 |      |        | 35.267 |
| 2  | 10.513 | 154038 | 48591  | M  | 0.000 |      |        | 9.333  |
| 3  | 13.841 | 913064 | 285850 | M  | 0.000 | mg   | 6      | 55.324 |

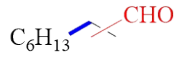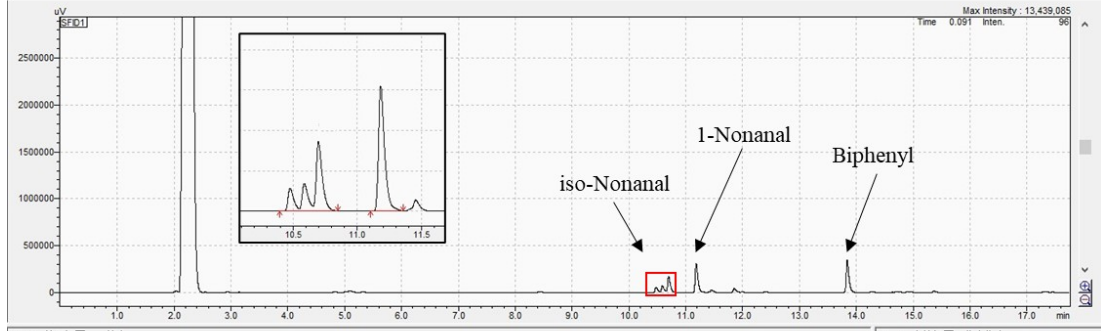

| 峰号 | 保留时间   | 面积      | 高度     | 标记 | 浓度      | 浓度单位 | 化合物ID号 | 面积%    | 面积比      |
|----|--------|---------|--------|----|---------|------|--------|--------|----------|
| 1  | 10.698 | 961565  | 171407 | M  | 213.837 | mg   | 4      | 30.968 | 0.856414 |
| 2  | 11.183 | 1020725 | 308381 | M  | 226.994 | mg   | 4      | 32.873 | 0.909106 |
| 3  | 13.840 | 1122780 | 346997 | M  | 0.000   | mg   | 6      | 36.160 | 1.00000  |

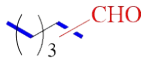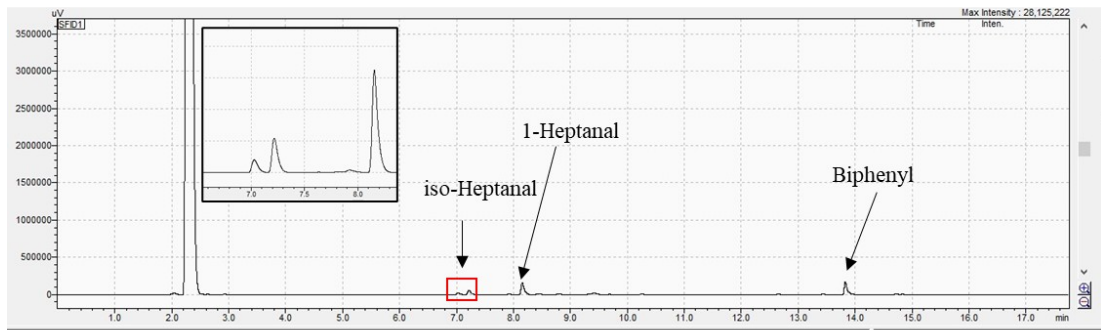

| 峰号 | 保留时间   | 面积     | 高度     | 标记 | 浓度    | 浓度单位 | 化合物ID号 | 面积%    | 面积比     |
|----|--------|--------|--------|----|-------|------|--------|--------|---------|
| 1  | 7.218  | 291567 | 54123  | M  | 0.000 |      |        | 19.558 | 0       |
| 2  | 8.154  | 593991 | 161389 | M  | 0.000 |      |        | 39.845 | 0       |
| 3  | 13.827 | 605187 | 168431 | M  | 0.000 | mg   | 6      | 40.596 | 1.00000 |

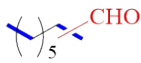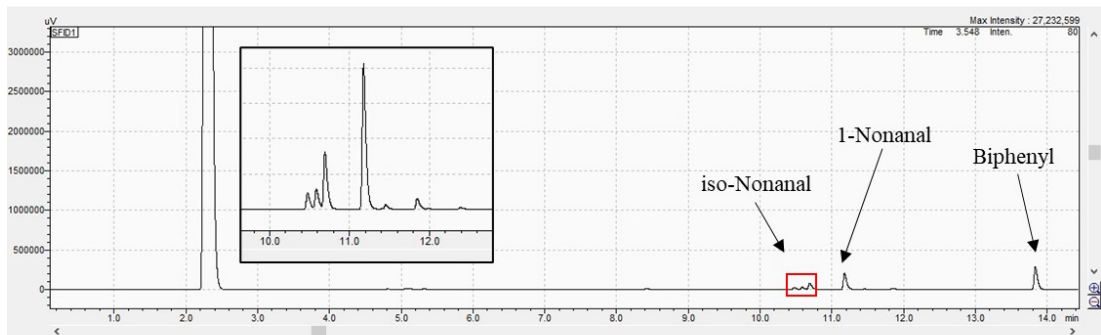

| 峰号 | 保留时间   | 面积     | 高度     | 标记 | 浓度      | 浓度单位 | 化合物ID号 | 面积%    | 面积比      |
|----|--------|--------|--------|----|---------|------|--------|--------|----------|
| 1  | 10.692 | 427975 | 80372  | M  | 95.175  | mg   | 4      | 21.036 | 0.455921 |
| 2  | 11.177 | 667826 | 205762 | M  | 148.514 | mg   | 4      | 32.825 | 0.711432 |
| 3  | 13.836 | 938706 | 289812 | M  | 0.000   | mg   | 6      | 46.139 | 1.00000  |

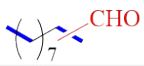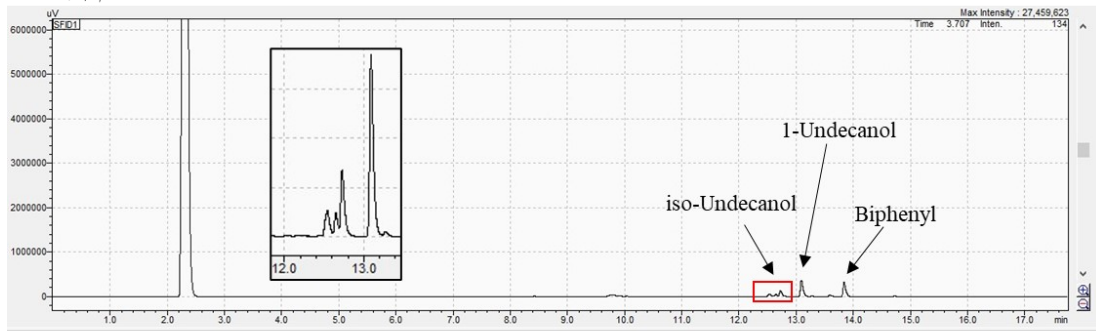

| 峰号 | 保留时间   | 面积      | 高度     | 标记 | 浓度    | 浓度单位 | 化合物ID号 | 面积%    | 面积比     |
|----|--------|---------|--------|----|-------|------|--------|--------|---------|
| 1  | 12.728 | 786904  | 134277 | M  | 0.000 |      |        | 25.663 | 0       |
| 2  | 13.093 | 1236725 | 369132 | M  | 0.000 |      |        | 40.333 | 0       |
| 3  | 13.839 | 1042655 | 325899 | M  | 0.000 | mg   | 6      | 34.004 | 1.00000 |

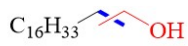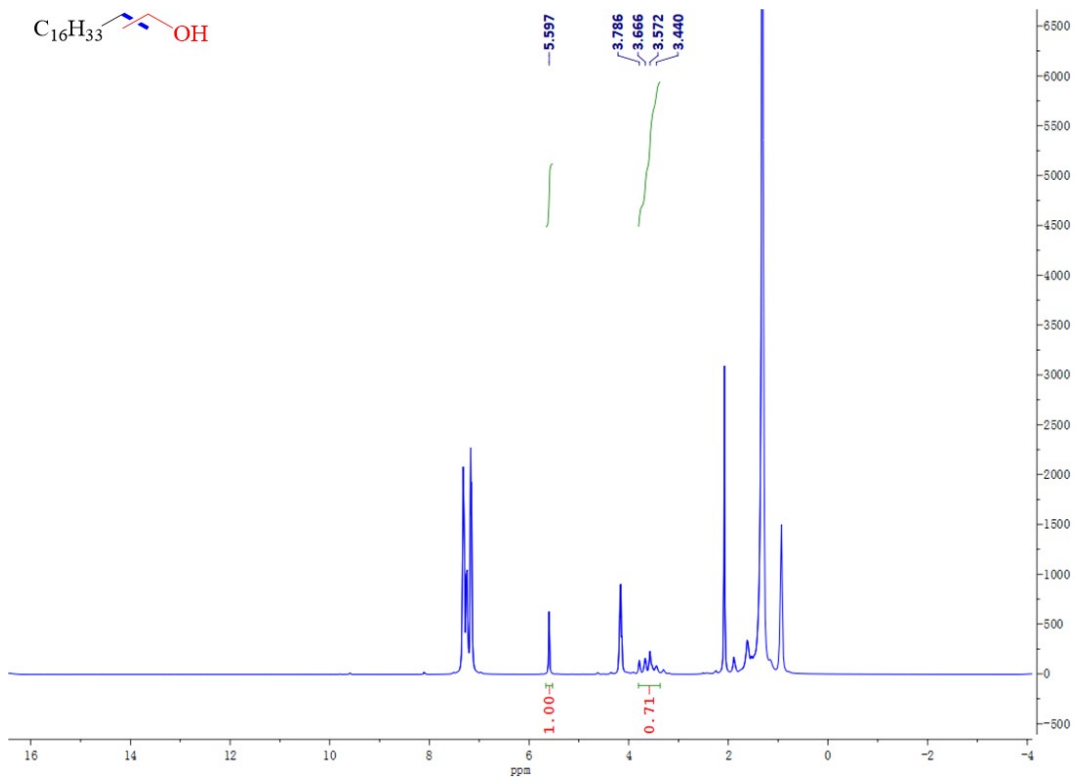



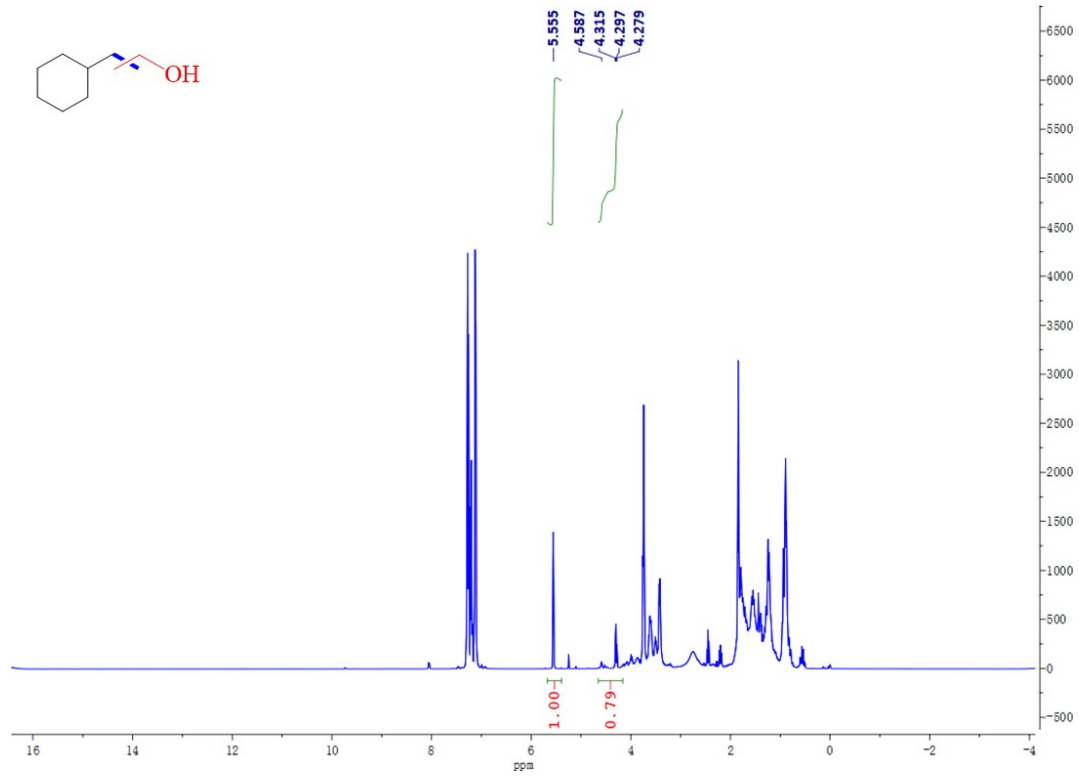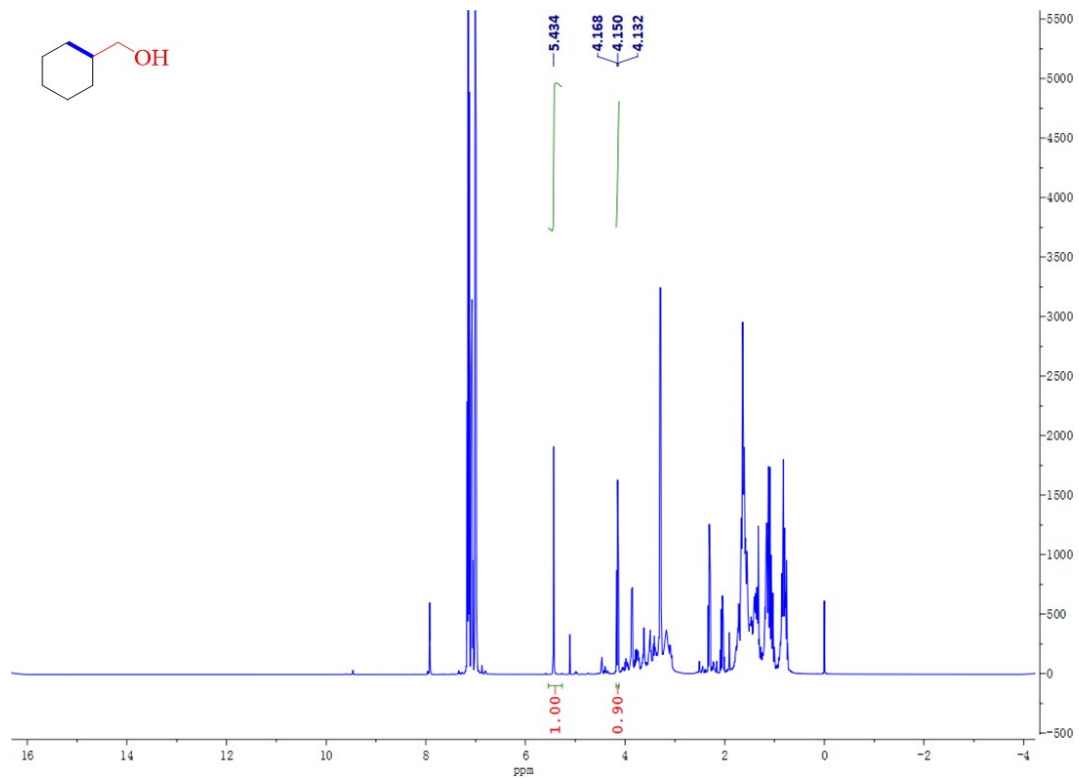

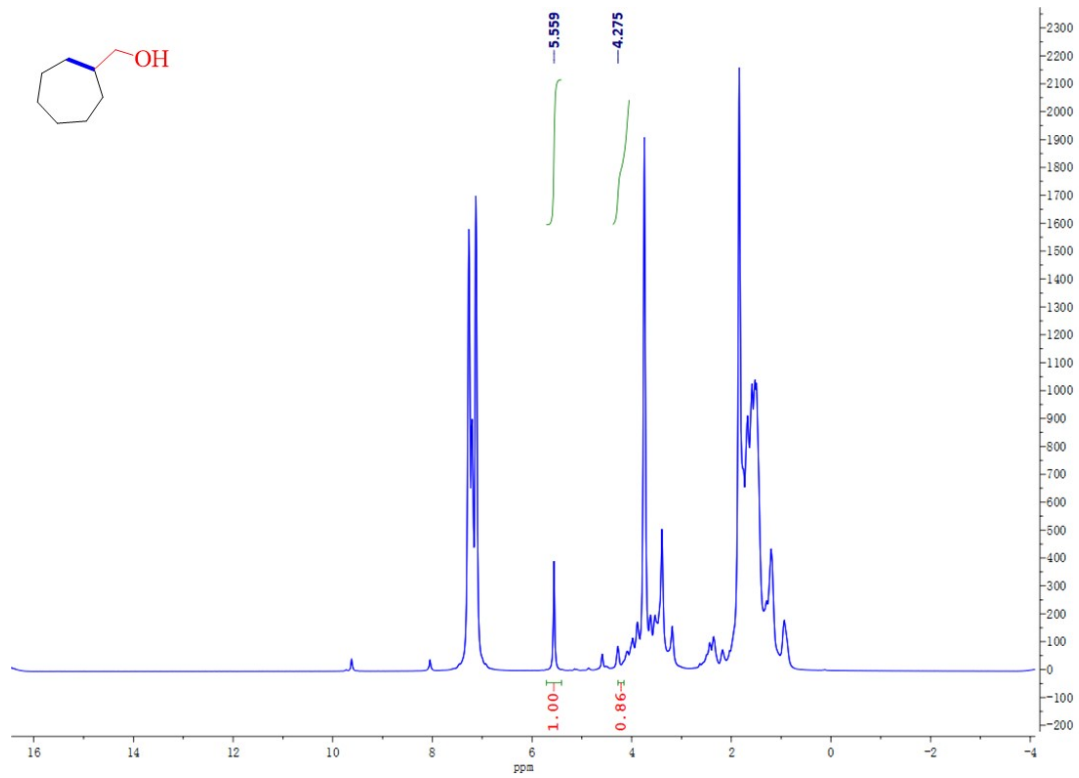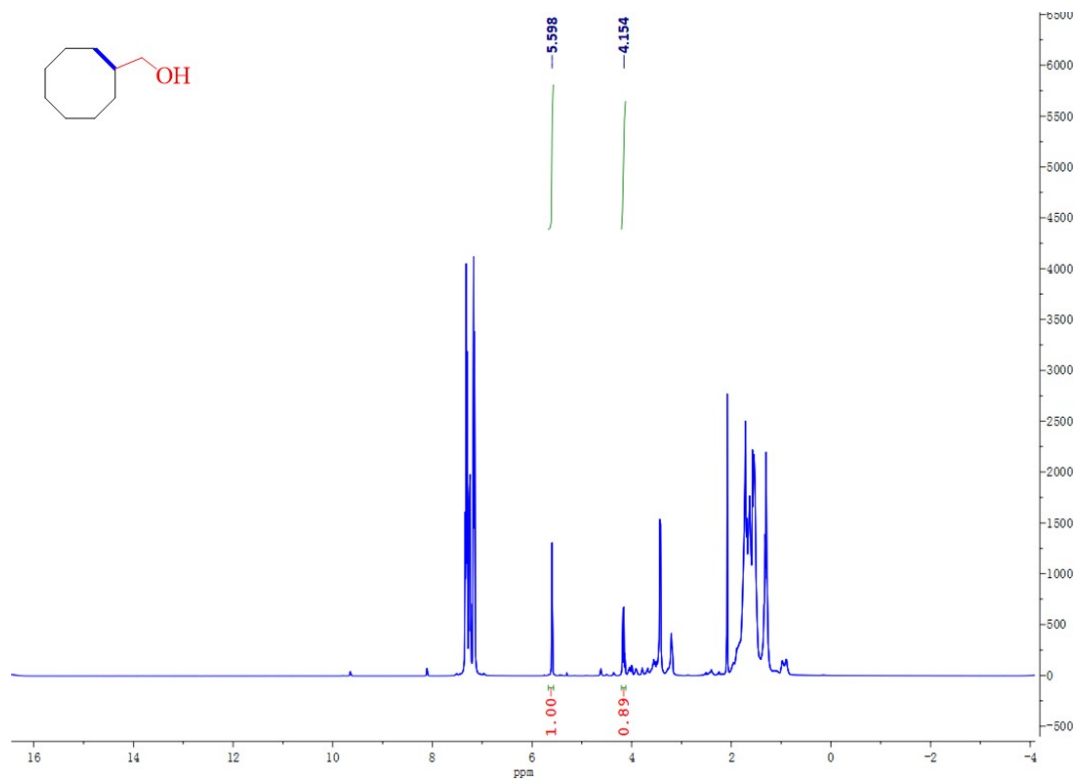

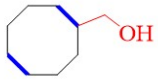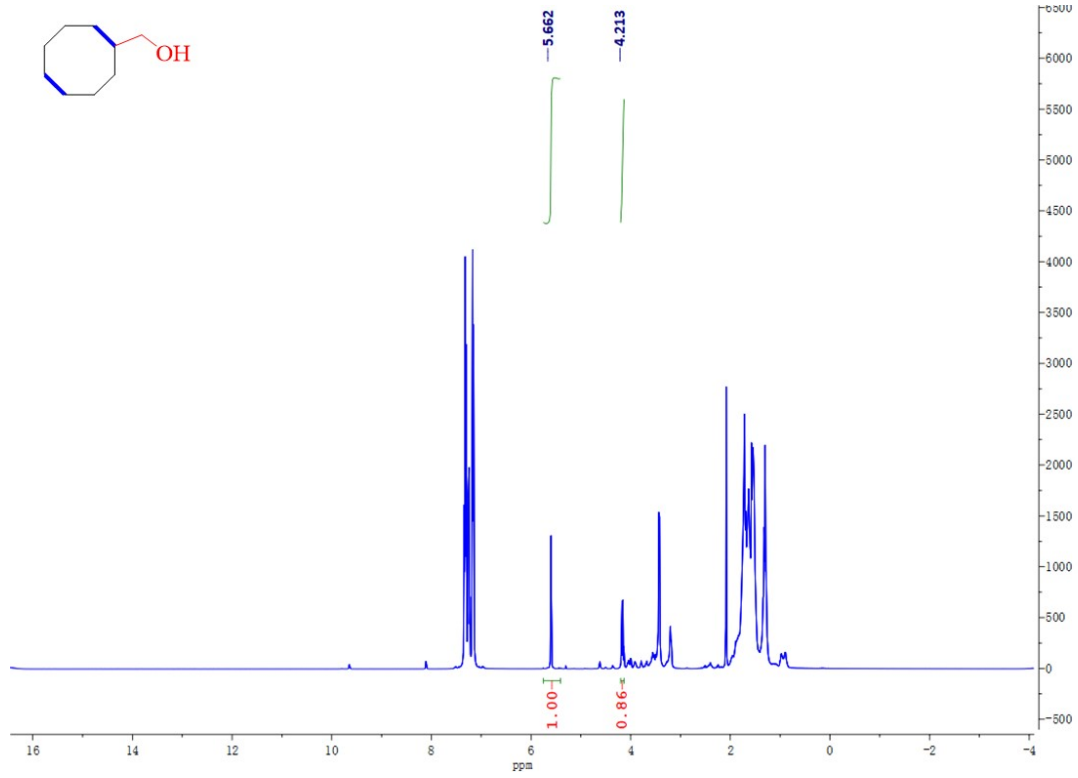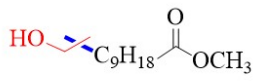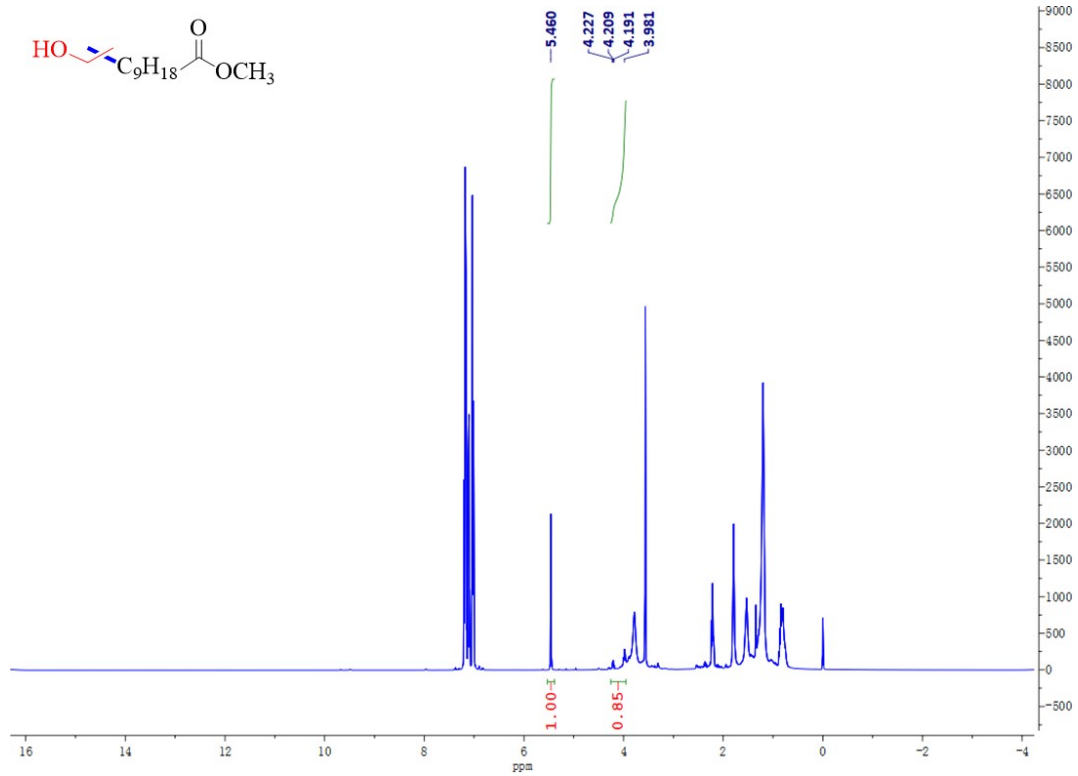



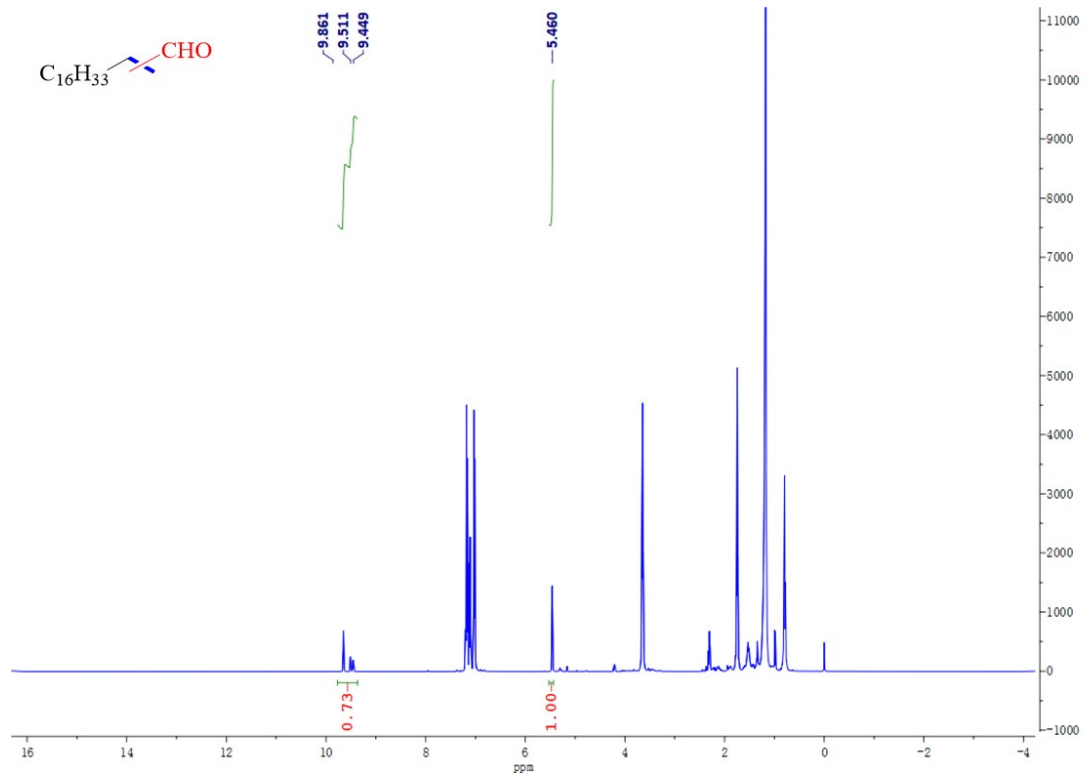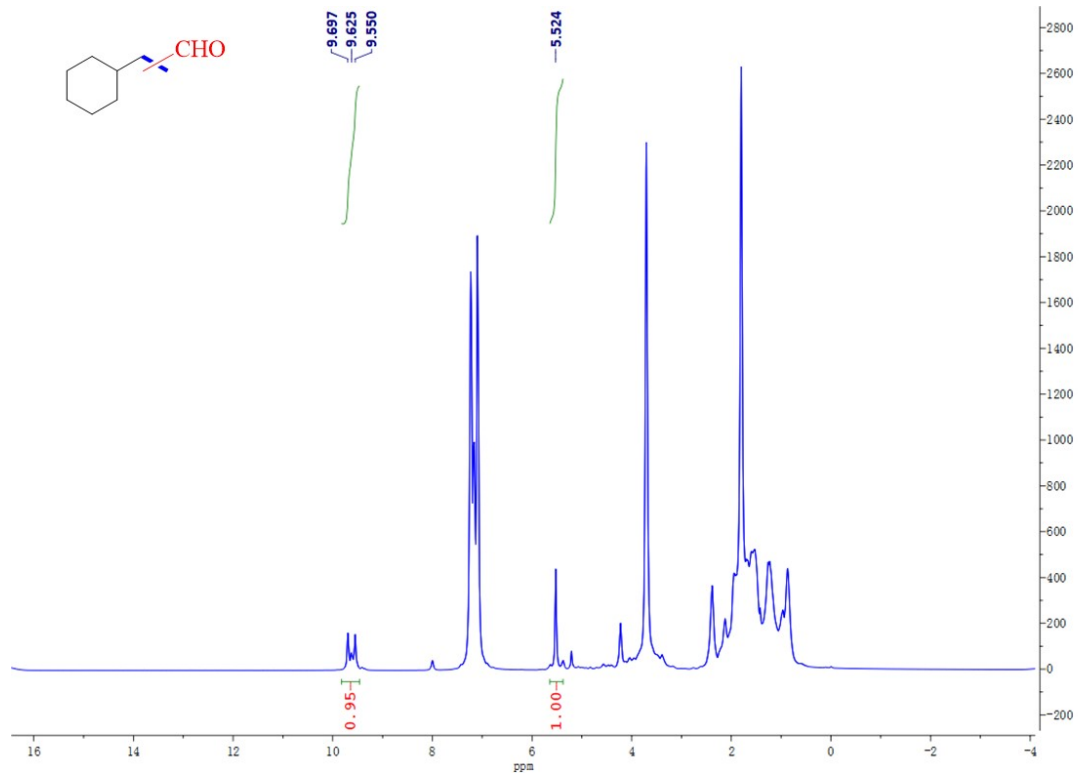

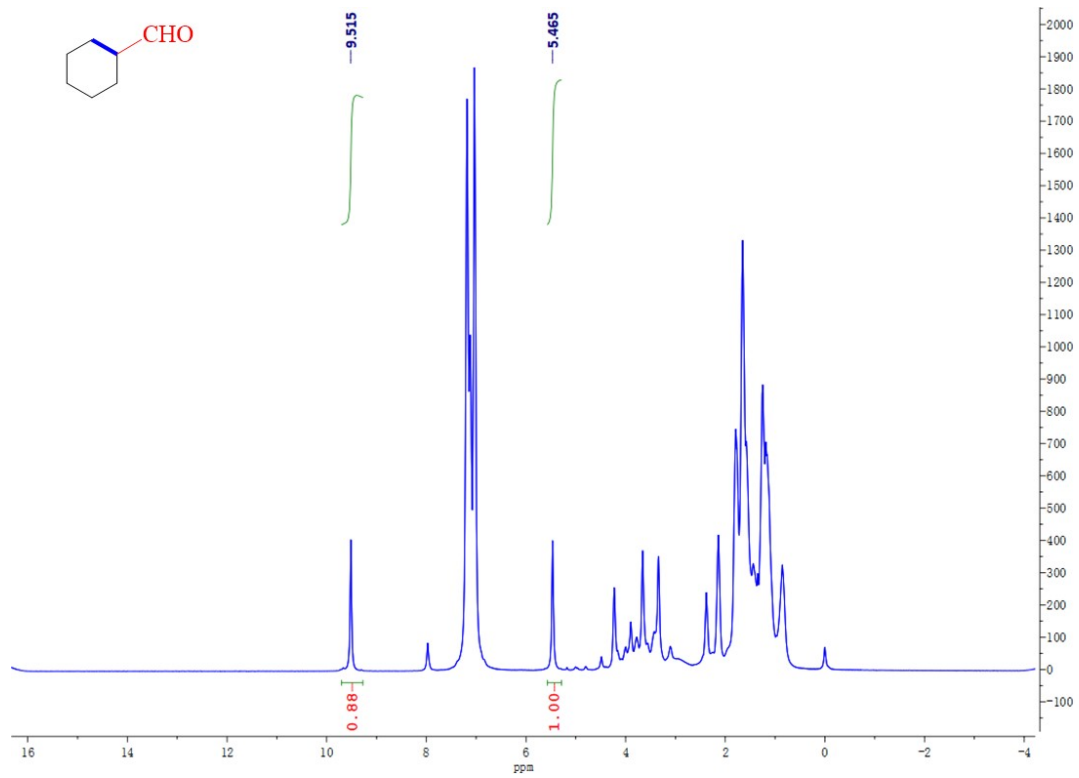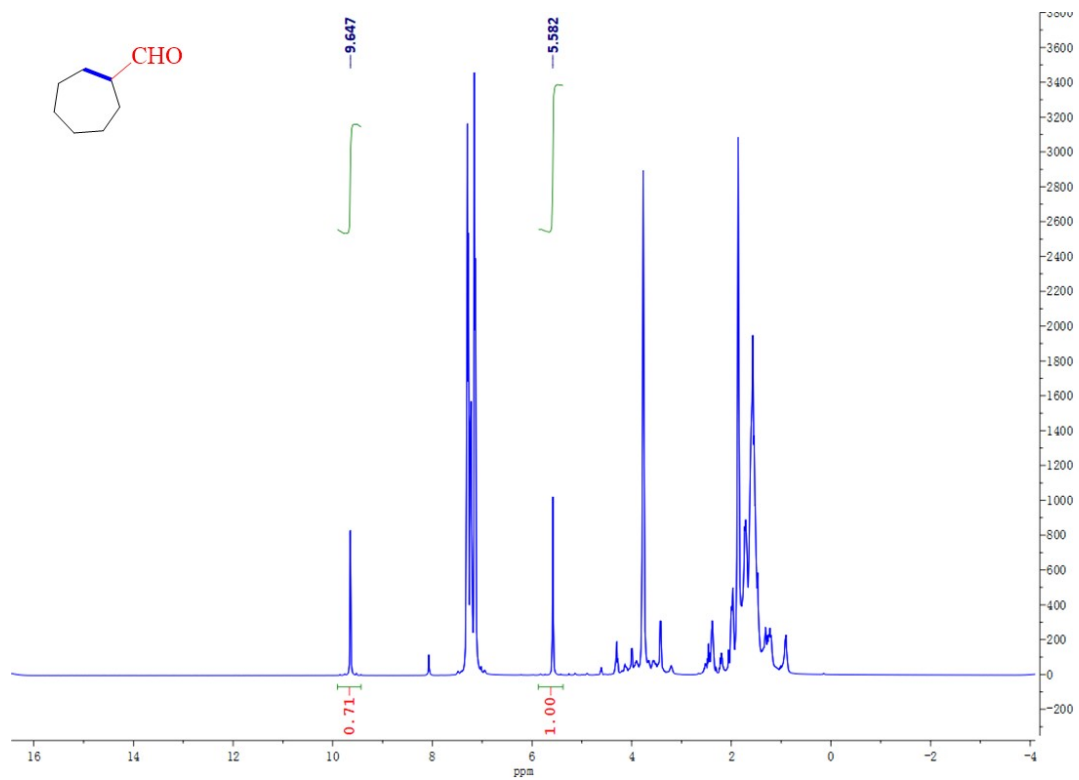

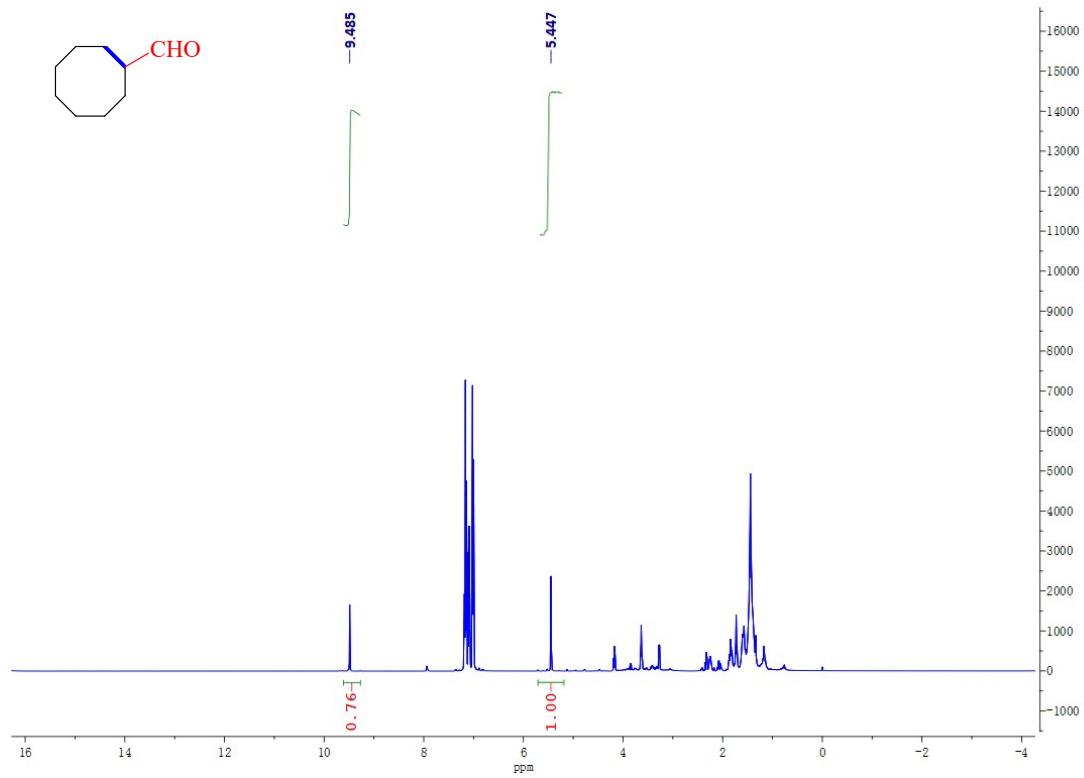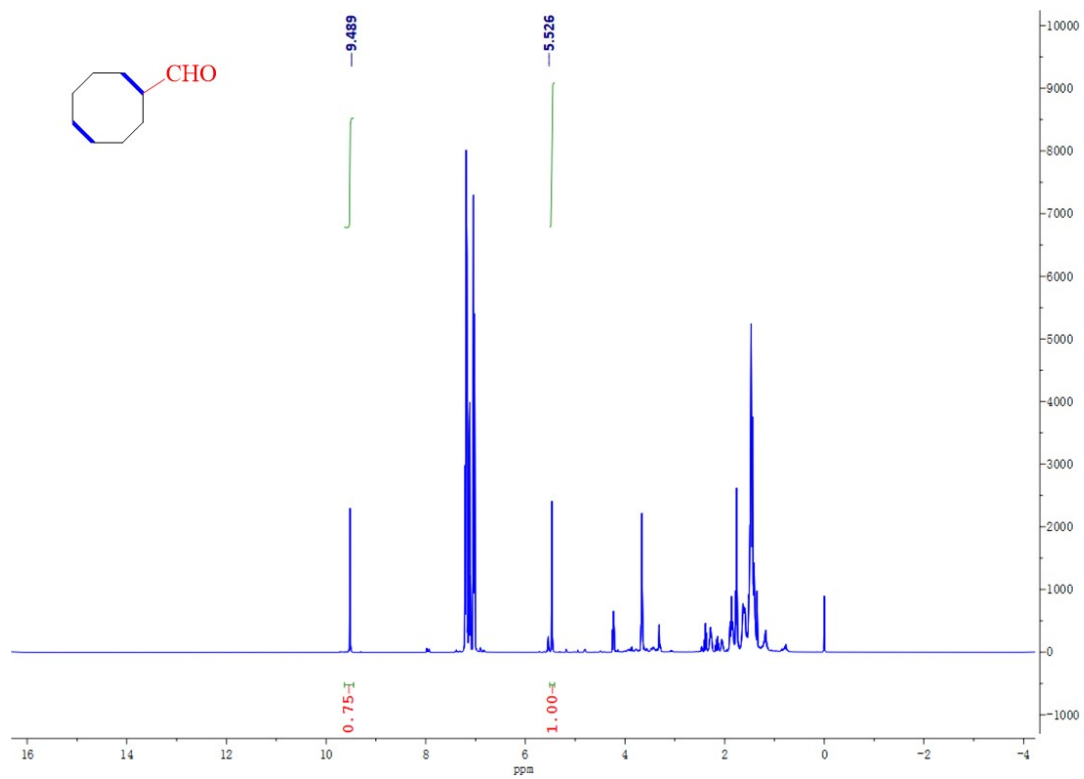

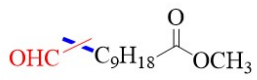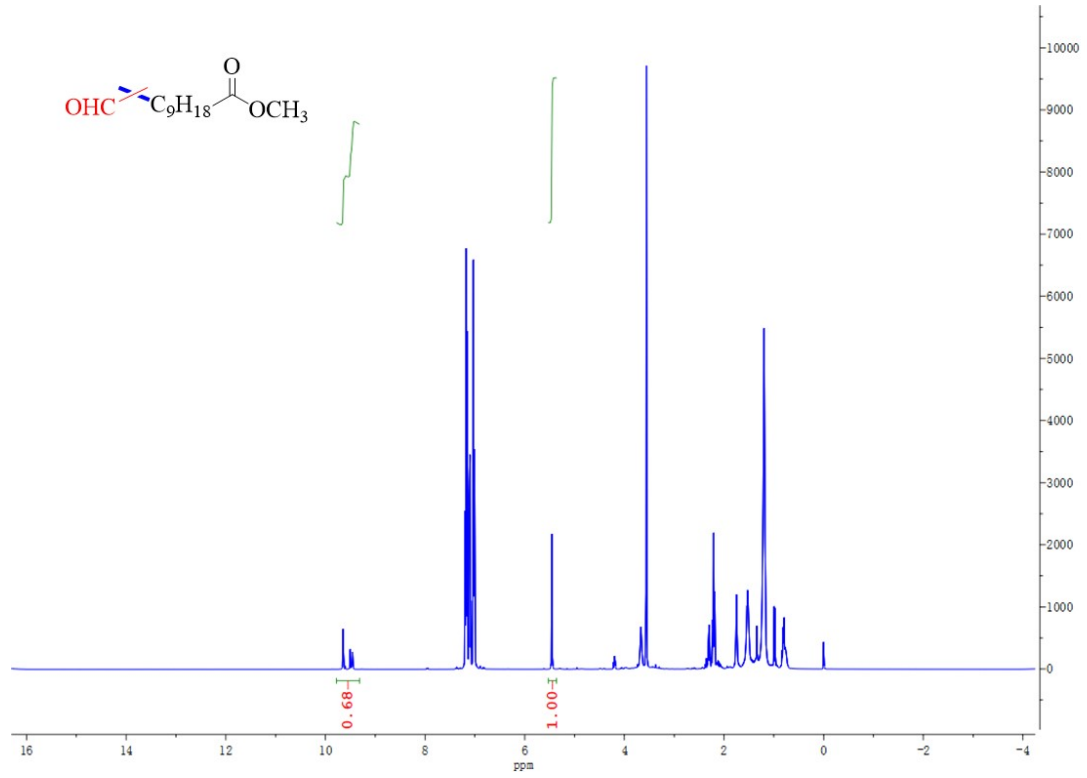

Supplement: d4cy01527d1.pdf [file d4cy01527d1.pdf]
